# Title

## Transcriptomic analysis of ribosome biogenesis and pre-rRNA processing during growth stress in *Entamoeba histolytica*

Sarah Naiyer<sup>\*1,2</sup>, Shashi Shekhar Singh<sup>2,5</sup>, Devinder Kaur<sup>2,6</sup>, Yatendra Pratap Singh<sup>2</sup>, Amartya Mukherjee<sup>2,3</sup>, Alok Bhattacharya<sup>4</sup> and Sudha Bhattacharya<sup>2,4</sup>.

2- School of Environmental Sciences, Jawaharlal Nehru University, New Delhi, India-110067

3- **Present Address:** Department of Molecular Reproduction, Development and Genetics, Indian Institute of Science Bangalore-560012

4- **Present Address:** Ashoka University, Rajiv Gandhi Education City, Sonapat, Haryana, India - 131029

5- **Present Address:** Department of inflammation and Immunity, Cleveland Clinic, Cleveland, OH, USA- 44195

6- **Present Address:** Central University of Punjab, Bathinda- 151401

### \*-Corresponding author

#### 1- Present Address

Sarah Naiyer, PhD

Department of Immunology and Microbiology

University of Illinois at Chicago, USA, 60612

Email: [snaiyer@uic.edu](mailto:snaiyer@uic.edu), [sara.naiyer@gmail.com](mailto:sara.naiyer@gmail.com)

## Abstract:

Ribosome biogenesis, a multi-step process involving the transcription, modification, folding and processing of rRNA is the major consumer of cellular energy. It involves the sequential assembly of ribosomal proteins (RP)s via more than 200 ribogenesis factors. Unlike model organisms where transcription of rRNA and RP genes slows down during stress, in *Entamoeba histolytica*, pre-rRNA synthesis continues, and unprocessed pre-rRNA accumulates. To gain insight into the vast repertoire of ribosome biogenesis factors and understand the major components playing role during stress we computationally identified the ribosome biogenesis factors in *E. histolytica*. Of the total ~279 *S. cerevisiae* proteins, we could only find 188 proteins in *E. histolytica*. Some of the proteins missing in *E. histolytica* were also missing in humans. A number of proteins represented by multiple genes in *S. cerevisiae* had only a single copy in *E. histolytica*. It was interesting to note that *E. histolytica* lacked mitochondrial ribosome biogenesis factors and had far less RNase components as compared to *S. cerevisiae*. Northern hybridization using probes from different spacer regions depicted the accumulation of unprocessed intermediates during stress. Transcriptomic studies revealed the differential regulation of a number of ribosomal factors both in serum-starved and RRP6KD conditions. The ARB1 protein involved at multiple steps of ribosome biogenesis and NEP1 and TSR3 involved in chemical modification of 18S rRNA previously shown to accumulate pre-rRNA precursors upon downregulation in *S. cerevisiae* and humans were included. The data reveals the importance of some of the major factors required for regulating pre-rRNA processing during stress. This is the first report on the complete repertoire of ribosome biogenesis factors in *E. histolytica*.

**Keywords:** Ribosome biogenesis; *Entamoeba histolytica*; RNase; transcription; transcriptome.

## Introduction:

The ribosome, in addition to being a conserved molecular factory for protein synthesis, is a complex multifaceted machinery engaged in the spatiotemporal control of gene expression (1). Due to the very large number of ribosomes in a typical cell their biosynthesis consumes a major part of cellular energy and nuclear space (2,3). Transcription of ribosomal RNA genes, and ribosome formation is thus highly regulated in response to general metabolism and specific environmental conditions (4,5). In eukaryotes, the small subunit of ribosome (40S) is composed of 18S rRNA assembled with 33 ribosomal proteins (RPs), while the large subunit (60S) has 5S, 5.8S, and 25S/28S rRNAs associated with 47 RPs (6). Ribosome biogenesis takes place in the nucleolus, in a multi-step process involving the transcription, modification, folding and processing of rRNA along with the assembly of RPs with the help of more than 200 ribogenesis factors. Much has been learnt about this complex process in model systems, especially *Saccharomyces cerevisiae*, and has been reviewed in various authoritative articles (7–13). A brief description of the ribosomal biogenesis process is as follows.

The primary rRNA transcript (35S in *S. cerevisiae*) undergoes multiple specific cleavages at the 5' and 3' external transcribed spacers (5'-ETS and 3'-ETS) and the internal transcribed spacers 1 (ITS1) and 2 (ITS2), to generate the mature 18S, 5.8S, and 25S/28S rRNAs (14). Pre-rRNA processing begins co-transcriptionally by the formation of 90S SSU processome, a ribonucleoprotein complex of ~70 assembly factors and several small nucleolar RNAs (snoRNAs). The protein components of the processome include RNA-binding proteins, endonucleases, RNA helicases, ATPases, GTPases, and kinases. The SSU processome proteins identified by co-purification with U3 snoRNA are termed the U three proteins (UTPs) (15). Both the RNA and protein components of the SSU processome are considered to function as a pre-

rRNA chaperone to assist in the correct folding of nascent pre-rRNA. This enables sequence-specific cleavages at sites A0, A1 and A2 to generate the pre-18S rRNA. Amongst the snoRNAs, U3 is a non-canonical C/D box-containing snoRNA that has the specialized function of assisting in pre-rRNA processing and maturation (16). It associates with the canonical C/D box-specific proteins, and the U3 snoRNA-specific RRP9/U3-55K protein (17) to form U3snoRNPs that base pair at specific sites within the 5'-ETS and the pre-18S rRNA to carry out processing at sites A0, A1 and A2 (18). The rRNA precursor is also chemically modified by the canonical C/D-box and the H/ACA-box containing snoRNAs required, respectively, for methylation and pseudouridylation of the rRNAs (19–22). After the modification, the snoRNAs that are base paired with their target sites in the pre-rRNA, are removed by the action of DExH/H-box RNA helicases. The correctly folded pre-rRNAs are assembled with RPs, which along with biogenesis factors are synthesized in the cytoplasm, and transported to the nucle(ol)us for assembly of pre-ribosomal particles (23).

The initial cleavages at sites A0 and A1 in the 5'-ETS lead to the 90S pre-ribosomal particle being separated into pre-40S and pre-60S particles via cleavage at site A2. It requires the release of 5'-ETS rRNA that is complexed with UTP-A, UTP-B, and U3snoRNPs (24). The endoribonucleases encoded by UTP24 (25), and RCL1 are likely involved in cleavage at A2 (26). The RNA helicase DHR1 also plays an important role in the dismantling of the 90S particle. After cleavage and trimming, the pre-40S particle is translocated to the cytoplasm through the nuclear pore complex. This process is facilitated by the GTPases GSP1/RAN and CRM1/XPO1 (27). The final stage of pre-40S maturation in the cytoplasm includes the NOB1 endoribonuclease-catalyzed cleavage at site D of the 20S pre-rRNA to form the mature 18S-rRNA (28).

Compared with 40S, the assembly of 60S particle appears to be much more complex. 5.8S rRNAs with different 5'-ends are produced by two alternative pathways (29,30). The maturation of 5'-end of 5.8S rRNA is coordinated with cleavage of the 3'-end of 25S/28S rRNA, which is a prerequisite for endonucleolytic cleavage of ITS2 at site C2 (31). Following this cleavage, the 7S precursor is released. The maturation of 5.8S 3'-end from the 7S precursor involves the nuclear exosome, assisted by the RNA helicase DOB1/MTR4, and 3'-5' exonucleases including RRP6 (32,33). The exonuclease RAT1 generates the mature 5'-end of the 25S rRNA from 26S precursor (34). Processing at both ends of ITS2 is catalyzed by the protein complex LAS1 (35). A number of export factors are required for final translocation of pre-60S particles to the cytoplasm. These factors interact with specific sites of the pre-60S ribosome. The export adaptor NMD3 binds to the large subunit and recruits the exportin CRM1/ XPO1 via its NES sequence (36). Other export factors include the MEX67-MTR2 heterodimer, and factors that shield the charged ribosomal surface against hydrophobic environment within the NPC channel (37,38).

Although many of the ribosomal biogenesis components described above are well conserved in yeast and human, a number of yeast-specific proteins have no known human homologs, pointing to important functional diversity amongst organisms. It will be interesting to explore the variations in this highly conserved function in evolutionarily distant organisms. We have been investigating the regulation of pre-rRNA processing and ribosome biogenesis under growth stress in the primitive parasitic protist, *Entamoeba histolytica*, which causes amoebiasis in humans (39). In this organism the rRNA genes are located exclusively on extrachromosomal circular molecules (40,41), and the nucleolus is organized at the nuclear periphery (42). Each rDNA circle may contain either one copy of the rDNA transcription unit, or two copies

organized as inverted repeats. In *E. histolytica* strain HM-1:IMSS, the 14 kb rDNA circle designated EhR2 contains one rDNA unit (43), for which the transcription start point has been mapped (44–46). We have earlier shown that pre-rRNA processing was inhibited in *E. histolytica* cells subjected to growth stress by serum starvation, leading to accumulation of unprocessed pre-rRNAs. There was strong accumulation of partially processed fragments of the 5'-ETS, which are otherwise rapidly degraded in unstressed cells (46). Anomalies in pre-rRNA processing during growth stress could result from downregulation of various components of the processing machinery, including endoribonucleases, exoribonucleases, and helicases. Our previous work has shown that the exosome-associated 3'-5' exoribonuclease EhRRP6 is down-regulated in serum-starved *E. histolytica*, and the enzyme is lost from the nuclei in starved cells (47). Since this enzyme is known to be involved in the removal of 5'-ETS sub fragments in model organisms (48,49), its down regulation during serum starvation could lead to the accumulation of partially processed fragments of 5'-ETS in *E. histolytica*.

To obtain a more comprehensive picture of pre-rRNA processing, we have now computationally identified the *S. cerevisiae* homologs of pre-rRNA processing and ribosome biogenesis factors in *E. histolytica*. Using northern hybridization, we have shown the accumulation of unprocessed intermediates during serum starvation. Further, we have used transcriptomic analysis to study the regulation of these components during growth stress, and in EhRRP6 down-regulated cell lines. The data provide insights into the unique features of ribosome biogenesis components in *E. histolytica*.

## Results and Discussion:

# **Computational identification of *E. histolytica* ribosome biogenesis and pre-rRNA processing proteins:**

Ribosome biogenesis factors in eukaryotes affect diverse cellular pathways, and perturbations in ribosome biogenesis are linked to human disease (50). To understand the status of ribosome biogenesis in *E. histolytica*, we searched the *E. histolytica* sequence database for presence of all matches with proteins known to be involved in ribosome biogenesis. Since *S. cerevisiae* is the model organism giving the deepest insights in ribosome biogenesis, we enlisted all *S. cerevisiae* proteins involved in the process and looked for their counterparts in *E. histolytica* (as detailed in methods section). A list of the classes of proteins known to play a role in ribosome biogenesis is shown in Table 1. The complete list of proteins is given in Supplementary Table 1. Of the total ~279 *S. cerevisiae* proteins listed (51), we could find matches for 188 proteins in *E. histolytica* (Table 1). Their transcription, as determined from our RNA-Seq data (52,53) ranged from very high to low.

Of the 188 listed *E. histolytica* genes involved in pre-rRNA processing, transcripts of 47 genes were either absent or they belonged to the very low/ low-expression categories. The low-expressing genes mainly included helicases, some kinases, phospholipid transporting P-type ATPase, rRNA biogenesis protein RRP5, exosome complex exonuclease RRP44, tRNA splicing endonuclease and some HSP70 family genes. Around 44 genes were associated with high/ very high expression levels and included the U3snoRNA family, fibrillarin, 13kDa ribonucleoprotein-associated protein, centromere/microtubule binding protein, snoRNP protein GAR1, H/ACA ribonucleoprotein complex subunit 2-like protein. These protein sets are well established to play the pivotal roles in pre-rRNA processing. Other protein families included protein phosphatase,

elongation factor 2, snRNP Sm D2, LSM domain containing protein, enhancer binding protein 2 (EBP2), eukaryotic translation initiation factor 6 and 40S ribosomal proteins S2, S4, S6, S7, S9, S21. We could not detect 91 proteins in *E. histolytica*, some of which play an essential role in *S. cerevisiae*. Some of these were also missing in humans, suggesting their divergent nature (Table 2). The evolution of alternative pathways in *S. cerevisiae* or functional redundancy in *E. histolytica* may account for this loss. Alternatively, some of these proteins might have been missed due to poor sequence homology.

We further analyzed the repertoire of ribosome biogenesis proteins, to understand the conserved and divergent features of this essential function in *E. histolytica*. We observed that a number of different proteins were represented by a single gene in *E. histolytica* as opposed to multiple genes in *S. cerevisiae* (Table 3). These belonged to protein families with very similar sequences and might have evolved from the same gene by duplication and divergence. There were 42 such protein families and they mostly included helicases, casein kinases, exonucleases and methyltransferases. We also found that the factors required for mitochondrial ribosome biogenesis like MTF1, MTG, GEP3 and MRM1 (217, 218, 219 and 225 in Supplementary Table 1), were not present in *E. histolytica* which could be expected since *E. histolytica* lacks typical mitochondria (54,55). All of the Box C/D snoRNPs and Box H/ACA snoRNPs were present in *E. histolytica* except for a non-core component NAF1(56), and the expression level of snoRNPs was generally high (with a few showing medium expression) (Table 1), suggesting that the process of pre-rRNA modification (methylation and pseudo-uridylation) is well conserved and extensive in *E. histolytica*.



Amongst all the factors associated with 90S-, pre-60S- and pre-40S-particles, it was the RNases that were strikingly less conserved in *E. histolytica*, compared to the helicases, GTPases and Kinases. We failed to find any homologue of the RNases RNT1, REX4, NGL2, REX2 and REX1 (Supplementary Table 1.2.4; 1.4; Table 4). The RNases found in *E. histolytica* included a single copy of debranching enzyme DBR1, containing an N-terminal metallophos domain, required for its activity. There were two copies of RAT1 and a single copy of XRN1(57). RAT1 together with its counterpart XRN1 are highly conserved 5'-3' exoribonucleases. They play a crucial role in gene transcription, RNA processing and RNA surveillance. These are required specifically for regulating mRNA homeostasis by removing processing intermediates, aberrant molecules, and decapped mRNAs, by acting post transcriptionally and co-transcriptionally(58–60). Like *S. cerevisiae*, Humans also possess 8 different RNases (51) most of which were not found in *E. histolytica* (Table 4). It is possible that *E. histolytica* utilizes a limited number of RNases to target a variety of substrates.

The RNase MRP(RMRP) is another important ribonuclease associated with pre-60S particles (Supplementary Table 1.4). It is a ribonucleoprotein complex of 8-10 protein subunits which are bound to an RNA molecule required for catalytic activity (9). Our data showed very low sequence homology with two RMRP subunits (POP1and RPP1), while the other subunits were absent in *E. histolytica* (Supplementary Table 1.4.3.1). Amongst other protozoan parasites *Giardia lamblia* is reported to have five RMRP protein subunits and *Leishmania* and *Trypanosoma* showed homology with only one subunit (RPP25) (61). The presence of RMRP RNA component is reported in *E. histolytica* (62,63), while it is absent in *Leishmania*, *Trypanosoma* and *Giardia*. RMRP is known to cleave pre-rRNA at the A3 site in the ITS 1, in a

manner similar to RNase P (64,65), the RNA component of which acts as a ribozyme (66). Mutations in the RNA component of RMRP are reported to cause cartilage hair hypoplasia (67,68). However, the absence of RNA component in RMRP from a number of parasites, and poor conservation of protein subunits suggests significant evolutionary diversity of this enzyme.

Amongst the proteins associated with 90S particles are the U3 snoRNPs (Supplementary Table 1.2). Previous work has shown that *E. histolytica* has 5 copies of U3snoRNA (69) which associate with conserved U3snoRNPs for modification of pre-rRNA. Of the 30 U3snoRNPs in *S. cerevisiae*, 23 were present in *E. histolytica*. The seven missing components were RRP7, NOP14, UTP3, UTP8, UTP9, UTP16 and UTP30. Of these UTP8, UTP9 and UTP16 were also missing in human. Amongst other proteins in 90S particles we found that 8-10 DEAD/DEAH box helicases and a single GTPase BMS1 was present in *E. histolytica*. Of the twenty-two other 90S factors, eight were missing in *E. histolytica* of which CIC1, CMS1 and NOP6 were also missing in human and were non-essential in *S. cerevisiae*. The other five (KRI1, NOP9, PXR1, RRP36 and TMA23) were present in human while absent in *E. histolytica*.

In the pre-40S particles (Supplementary Table 1.3), of the 20 export and cytoplasmic maturation factors required during the formation of 40S, three factors LTV1, SXM1 and KAP114 were missing in *E. histolytica*, all being present in human. SLX9 and eukaryotic translation initiation factor 3 subunit J (HCR1) were also missing from pre-40S particles. The most important export factor CRM1 known to be responsible for the export of both 60S and 40S subunits to the cytoplasm was present in *E. histolytica* with moderate homology and sequence similarity; however, it is annotated as a hypothetical protein in the database. An important kinase of 60S

particle GRC3 (NOL9 in humans), which cooperates with the endoribonuclease LAS1 to process pre-rRNA at site C2 in ITS2 (70), was also missing in *E. histolytica*. However XRN2, which is also reported to play a role in the processing of ITS2, was present (Figure 1a) (71). Protein kinases HRR25 and RIO2 which are known to associate with pre-40S particle were present in *E. histolytica*. HRR25 phosphorylates ribosomal protein RPS3, dephosphorylation of which marks the maturation of 40S particle (72). A number of other accessory factors were missing in *E. histolytica*. Some of the unique features of *E. histolytica*, namely organization of rRNA genes as extrachromosomal circles (41), and location of nucleolus at the nuclear periphery (42), may explain the differences in ribosome biogenesis machinery between *E. histolytica* and *S. cerevisiae*. Our data highlighted that 67% of the 279 *S. cerevisiae* genes involved in ribosome biogenesis could be found in *E. histolytica* with a high degree of sequence conservation, implying the use of most of the conserved pathways found in *S. cerevisiae*. It will be interesting to see the impact of the missing 33% genes (some of which may have been missed due to poor homology) on alternative strategies of ribosome biogenesis employed by *E. histolytica*, and possibly by other protists.

# **Effect of growth stress on transcription of pre-rRNA processing and ribosome biogenesis-genes in *E. histolytica***

Stress signals cease the transcription of rRNA genes in most model organisms. The demand for ribosomes is reduced in response to various environmental stresses e.g. serum starvation (73), inhibition of protein synthesis by cycloheximide treatment, and oxidative stress (74–79). This growth-dependent regulation of rRNA synthesis is conserved from bacteria to vertebrates (73).

Growth stress induced by serum starvation in *E. histolytica* leads to the accumulation of unprocessed pre-rRNA, and 5'-ETS intermediates, which are otherwise rapidly degraded during normal growth conditions (46). We have earlier shown that the exosomal subunit RRP6 is lost from the nucleus during serum starvation, which could lead to the accumulation of 5'-ETS sub fragments (47). To obtain a more comprehensive picture of the defects in pre-rRNA processing during growth stress in *E. histolytica* we looked for the accumulation of other intermediates during serum starvation, using probes from each segment of pre-rRNA, in a northern hybridization analysis. We observed an accumulation of different intermediates in *E. histolytica* with all the probes. The 5'-ETS probe, showed accumulation of 0.7 -0.9 kb fragment while the ITS1, 5.8S and ITS2 probes showed accumulation of a ~2 kb intermediate (Figure 1b). These data imply a more generalized defect in pre-rRNA processing during serum starvation. This could be due to the cumulative effect of loss of activity of a number of proteins, including endo- or exonucleases, required for the cleavage and trimming of pre-rRNA, and RNA helicases, the role of which in accumulation of pre-rRNA intermediates is well known (80).

A number of check points prevent entry of immature ribosomes into the translating pool (8,11). The discovery of ribosomopathies, due to mutations in genes encoding ribosome biogenesis factors, has shed new light on the link between ribosome biogenesis and cell fate (81). Defects in pre-rRNA processing, nucleolar organization and ribosomal subunit accumulation have been detected in the cells from patients suffering from ribosomopathies. To explore the possible factors responsible for the defects in pre-rRNA processing during growth stress in *E. histolytica*, we analyzed the transcriptome of trophozoites grown in normal conditions and after 24hrs of serum starvation. Differential RNA expression analysis of all the ribosome biogenesis proteins

present in *E. histolytica* led us to identify a number of possible factors that could interfere in pre-rRNA processing. The expression values of all the listed genes in normal and serum starved growth conditions are represented as heat map in Figure 2a. Of the 253 genes involved in pre-rRNA processing in *E. histolytica*, 40 genes showed differential expression (>1.5-fold change) of which 22 were upregulated and 18 were downregulated (Table 5, 6 respectively). The upregulated genes included three HSPs, four helicases, casein kinase, mRNA decay protein, and cytoplasmic export protein, NMD3. Casein Kinase showed the highest fold change of 3.56. NMD3 upregulation indicates the initiation of mRNA decay pathway during growth stress. RNA helicases function at many steps, including snoRNA unwinding after pre-rRNA modification (82) (Table 5, 6). The downregulated transcripts included H/ACA snoRNP complex, NEP1 methylase, NMD4 and the exosome component 10 (RRP6) which has a 3'-5' exonuclease activity. It is involved in 5'-ETS degradation and 5.8S rRNA processing, and our earlier work has shown that it is down regulated and is lost from nuclei during serum starvation (47,69). We also demonstrated that EhRRP6 acts as a stress sensor, as upregulating EhRRP6 protected the cells against stress while its downregulation hampered cell growth. Casein kinase in yeast is reported to regulate a switch between productive and non-productive pre-rRNA processing pathways post-transcriptionally during stress (83). Downregulation of NEP1 methylase has been shown to block pre-rRNA processing at sites A0, A1 and A2 (84). Thus, incomplete pre-rRNA modification, non-productive pre-rRNA processing, and the inefficient process of RNA intermediate degradation, along with other above-mentioned factors, could together or individually lead to the accumulation of unprocessed intermediates.

## Effect of EhRRP6 downregulation on expression of ribosome biogenesis factors in *E. histolytica*:

The downregulation of exonuclease RRP6 and its loss from the nucleus during serum starvation (47) led us to investigate the global effect of RRP6 silencing on *E. histolytica* transcriptome compared to the changes observed in serum starvation. The heat map in Figure 2a represents the expression values of all the ribosomal genes in TOC, RRP6 downregulation, normal and SS growth conditions. Of the ribosome biogenesis factors present in *E. histolytica*, 102 genes showed >1.5fold change in EhRRP6 silenced cells as compared to 40 genes in serum starved conditions.

78 genes were upregulated in RRP6-silenced cells, of which 63 were significant (p-value < 0.05), 14 of these 78 were also upregulated in serum starved cells, of which only two were significant in both datasets (Figure 2b, Table 7). These two proteins were protein phosphatase (PTC2) and non-transported Abc protein ARB1. Along with the snoRNPs the other upregulated factors included helicases, GTPase, elongation factors, HSPs, cell cycle proteins, other components of exosome complex and RNase MRP. Interestingly ARB1 associates with ribosomes and has been proposed to serve as a mechanochemical ATPase, stimulating multiple steps in 40S and 60S ribosome biogenesis. Its depletion from *S. cerevisiae* led to slower cleavage at A0, A1 and A2 sites in pre-rRNA (85). Its transcriptional up regulation under conditions where pre-rRNA processing has slowed down could indicate its alternate roles in *E. histolytica*, or that the gene may be post-transcriptionally regulated, as is the case with RPs in *E. histolytica* (86).

34 genes were downregulated in RRP6-silenced cells, with 14 genes having significant p-values (Table 8). These included helicases, HSPs, casein kinases, Box H/ACA snoRNPs and U3 snoRNP subunits, TSR4 (a programmed cell death protein) and LSM-domain containing proteins. Four of these genes were downregulated in serum starved cells as well, with two having significant p-values. These genes, downregulated in both datasets, were NEP1 and TSR3. The latter is annotated as a hypothetical protein in *E. histolytica*. Interestingly, both of these genes are involved in chemical modification of the hypermodified nucleotide N1-methyl-N3-aminocarboxypropyl(acp) pseudouridine located on 18S rRNA next to the P-site tRNA (87). This highly conserved base modification in eukaryotes is completed in three steps. In the first step uridine is converted to pseudouridine guided by a snoRNP. In the second step NEP1 methyltransferase adds a methyl group donated by S-adenosylmethionine (SAM). In the third step, which takes place in the cytoplasm, TSR3 adds the APC group from SAM to this nucleotide. This is a crucial step in 18S rRNA maturation. TSR3 downregulation results in accumulation of 20S rRNA precursor, along with accumulation of full-length pre-rRNA (35S) in yeast and (47S) in human. NEP1 also has a crucial role, and its downregulation results in blockage of pre-rRNA processing at sites A0, A1 and A2 (84). Our data suggest that these proteins are crucial in *E. histolytica* as well, and their expression could be regulated in a common pathway that is responsive both to serum stress and RRP6 downregulation.

In conclusion, our data reveal the multiple factors that simultaneously lead to the inhibition of pre-rRNA processing and accumulation of intermediates during growth stress (Figure 3), thus effectively inhibiting ribosome biogenesis by the non-availability of mature rRNAs. Of special interest are the genes affected in a similar manner by both serum starvation and RRP6 down

regulation. This work opens up further avenues for detailed molecular investigation of ribosome biogenesis in *E. histolytica*.

## Methods:

### Computational identification of *E. histolytica* ribosome biogenesis and pre-rRNA processing proteins

*S. cerevisiae* was used as a reference organism and homologous proteins involved in ribosome biogenesis and pre-rRNA processing in *E. histolytica* were searched. A list of proteins already known to be the part of ribosome biogenesis was compiled using *Saccharomyces* Genome Database (SGD) by applying Gene Ontology Term: ‘rRNA processing’ and ‘Ribosome biogenesis’. The enlisted proteins were further filtered using ‘UniProt’ as Source. Proteins were cross checked in KEGG (Kyoto Encyclopaedia of Genes and Genomes) PATHWAY Database using Keyword: ‘Ribosome biogenesis in eukaryotes’ and filtered keeping ‘*S. cerevisiae*’ as the concerned organism. Proteins were annotated using ‘Function’ from UniProt or ‘Description’ from SGD. Homologous proteins in *E. histolytica* were obtained using PANTHER (Protein Analysis THrough Evolutionary Relationships), AmoebaDB and EggNOG (evolutionary genealogy of genes: Non-supervised Orthologous Groups) databases. BLASTP was performed against respective protein sequence of *E. histolytica* obtained from AmoebaDB restricting the search only to “*Entamoeba histolytica* HM-1:IMSS (taxid:294381)” to obtain an E-value, score, coverage, maximum identity and domains present. The proteins were functionally classified using the KEGG classification. The accession number and annotation were obtained from NCBI,



protein database. The expression level of respective genes was extracted from the transcriptome data.

## Cell culture and growth conditions

Trophozoites of *E. histolytica* strain HM-1:IMSS were axenically maintained in TYI-S-33 medium supplemented with 15% adult bovine serum (Biological industries, Israel), Diamond's Vitamin mix, Tween 80 solution (Sigma–Aldrich) and antibiotics (0.3 units/ml penicillin and 0.25 mg/ml streptomycin) at 35.5°C (88). For serum starvation, medium from early to mid-log phase grown trophozoites (48 hrs) was replaced with TYI-S-33 medium containing 0.5% adult bovine serum and incubation continued for 24hrs.

## RNA isolation and Transcriptome analysis

Cells were harvested from normal, serum starvation, TOC and Rrp6-depleted conditions (47). Total RNA from  $\sim 5 \times 10^6$  cells were purified using TRIzol reagent (Invitrogen) according to the manufacturer's instructions. Total RNA, from two biological replicates of each sample was used for selection of polyA plus RNA and library preparation was done after oligo (dT) selection. RNA-Seq libraries were generated and subjected to paired-end sequencing on the Illumina HiSeq2500 (v3 Chemistry) platform (52). The pre-processed reads were aligned to the *E. histolytica* (HM1:IMSS) genome for which the gene model was downloaded from AmoebaDB (<http://amoebadb.org/common/downloads/release-27/EhistolyticaHM1IMSS/gff/data/>). The alignment was performed using Tophat program (version 2.0.11) with default parameters. The

RSEM program (version 1.3.0) was used for estimating expression of the genes and transcripts(89). The differential gene expression analysis was performed using cuffdiff program of cufflinks package with default settings to analyze the difference between normal and serum starved cells. Log<sub>2</sub> fold change was set as a cut-off for differential expression. Real time qRT PCR was done to validate the data (52). Heatmap was prepared using ggplot2 in R Studio. The Venn diagram was plotted using Venny<sup>2.1</sup> (<https://bioinfogp.cnb.csic.es/tools/venny/>).

## Northern blotting

For Northern blot analysis 10 µg of total RNA was resolved on a 1.2% formaldehyde-agarose gel in gel running buffer (0.1 M MOPS (pH 7.0), 40 mM sodium acetate, 5 mM EDTA (pH 8.0)) and 37% formaldehyde at 4 V/cm. The RNA was transferred on to GeneScreen plus R membrane (PerkinElmer). [ $\alpha$ -<sup>32</sup>P]dATP-labeled probe was prepared by random priming method using the DecaLabel DNA labeling kit (Thermo Scientific). Hybridization and washing conditions for RNA blots were as per the manufacturer's instructions.

## Figure legends:

**Figure 1:** (a) Schematic linear view of rDNA transcription unit indicating Sc processing sites. The dotted arrows indicate the sites present in *E. histolytica*. The size of the 5'-ETS (2.672 kb), 18S (1.921 kb), ITS1 (149 bp), 5.8S (150 bp), ITS2 (123 bp), 28S (3.544 kb) and IGS (5.183 kb) accounts for the 14 kb rDNA of *E. histolytica*. (b) Northern hybridization of total RNA from *E. histolytica* cells grown under normal (N) and serum starved (SS) conditions. The probes used are indicated. The lanes with 18S and 28S probes were exposed very briefly and show the position

of the mature rRNAs. 28S rRNA in *E. histolytica* has an internal nick and two probe sets were used as indicated. The bands accumulated in SS cells are marked in circle.

**Figure 2:** (a) Heat map showing the log<sub>2</sub> expression of all ribosome biogenesis factors in *E. histolytica* during TOC, Rrp6KD, normal and serum starved growth conditions. Red color depicts high expressing genes and blue color depicts low expressing genes. (b) Venn diagram shows an overlap of the differentially expressed genes in all the four conditions. Down\_SS-Downregulated in SS; Up\_SS-Upregulated in SS; Down\_RRP6KD-Downregulated in RRP6KD; Up\_RRP6KD- Upregulated in RRP6KD.

**Figure 3:** Model depicting factors regulating pre-rRNA processing and accumulation of intermediates during growth stress

## Competing interests

The authors declare no competing interests.

## Funding

This work was supported by DAE-BRNS and INSA fellowship to SB, Council of Scientific and Industrial Research fellowship to SN and SSS.

## Authors' contributions

SN and SB were involved in the study design. SN, SSS, DK, YP, AM conducted the study. SN and SB analyzed and interpreted the data. SN and SB drafted the manuscript. All authors read and approved the final manuscript.

## Acknowledgement

We thank Sneha Bhat, Central University of Punjab, Bathinda, for her contribution in RNA-Seq analysis.

## References:

1. Baßler J, Hurt E, Sondalle SB, Longerich S, Ogawa LM, Sung P, et al. Defining the RNA interactome by total RNA □ associated protein purification . Cell [Internet]. 2019;176(7):165–9. Available from: <http://dx.doi.org/10.1016/j.cell.2017.11.039>
2. Warner JR. The economics of ribosome biosynthesis in yeast. Trends Biochem Sci. 1999 Nov;24(11):437–40.
3. Hernandez-Verdun D, Roussel P, Thiry M, Sirri V, Lafontaine DLJ. The nucleolus: structure/function relationship in RNA metabolism. Wiley Interdiscip Rev RNA. 2010;1(3):415–31.
4. Grummt I. Life on a planet of its own: regulation of RNA polymerase I transcription in the nucleolus. Genes Dev [Internet]. 2003;17(14):1691–702. Available from: <http://www.genesdev.org/cgi/doi/10.1101/gad.1098503R>
5. Moss T. At the crossroads of growth control; making ribosomal RNA. Curr Opin Genet Dev [Internet]. 2004;14(2):210–7. Available from:

<http://linkinghub.elsevier.com/retrieve/pii/S0959437X04000279>

6. Jenner L, Melnikov S, de Loubresse NG, Ben-Shem A, Iskakova M, Urzhumtsev A, et al.

Crystal structure of the 80S yeast ribosome. *Curr Opin Struct Biol* [Internet].

2012;22(6):759–67. Available from:

<http://linkinghub.elsevier.com/retrieve/pii/S0959440X12001248>

7. Iarovaia O V., Minina EP, Sheval E V., Onichtchouk D, Dokudovskaya S, Razin S V., et

al. Nucleolus: A Central Hub for Nuclear Functions. *Trends Cell Biol* [Internet].

2019;29(8):647–59. Available from: <https://doi.org/10.1016/j.tcb.2019.04.003>

8. Parker MD, Collins JC, Korona B, Ghalei H, Karbstein K. A kinase-dependent checkpoint

prevents escape of immature ribosomes into the translating pool. *PLoS Biol* [Internet].

2019;17(12):1–22. Available from: <http://dx.doi.org/10.1371/journal.pbio.3000329>

9. Kressler D, Hurt E, Baßler J. A Puzzle of Life: Crafting Ribosomal Subunits. *Trends*

*Biochem Sci* [Internet]. 2017;42(8):640–54. Available from:

<http://www.sciencedirect.com/science/article/pii/S0968000417300932>

10. Chaker-Margot M, Barandun J, Hunziker M, Klinge S. Architecture of the yeast small

subunit processome. *Science* (80- ). 2017;355(6321).

11. Peña C, Hurt E, Panse VG. Eukaryotic ribosome assembly, transport and quality control.

*Nat Struct Mol Biol*. 2017 Sep;24(9):689–99.

12. Lau B, Cheng J, Flemming D, La Venuta G, Berninghausen O, Beckmann R, et al.

Structure of the Maturing 90S Pre-ribosome in Association with the RNA Exosome. *Mol*

*Cell* [Internet]. 2021;81(2):293-303.e4. Available from:

<https://doi.org/10.1016/j.molcel.2020.11.009>

13. Genuth NR, Barna M. The Discovery of Ribosome Heterogeneity and Its Implications for

- Gene Regulation and Organismal Life. *Mol Cell* [Internet]. 2018;71(3):364–74. Available from: <https://doi.org/10.1016/j.molcel.2018.07.018>
14. Henras AK, Plisson-Chastang C, O'Donohue M-F, Chakraborty A, Gleizes P-E. An overview of pre-ribosomal RNA processing in eukaryotes: Pre-ribosomal RNA processing in eukaryotes. *Wiley Interdiscip Rev RNA* [Internet]. 2015;6(2):225–42. Available from: <http://doi.wiley.com/10.1002/wrna.1269>
15. Bernstein KA, Gallagher JEG, Mitchell BM, Granneman S, Baserga SJ. The Small-Subunit Processome Is a Ribosome Assembly Intermediate. *Eukaryot Cell*. 2004;3(6):1619-1626 %U [http://ec.asm.org/cgi/doi/10.1128/EC](http://ec.asm.org/cgi/doi/10.1128/EC.2004.3(6):1619-1626).
16. Kass S, Tyc K, Steitz JA, Sollner-Webb B. The U3 small nucleolar ribonucleoprotein functions in the first step of preribosomal RNA processing. *Cell*. 1990 Mar;60(6):897–908.
17. Clerget G, Bourguignon-Igel V, Marmier-Gourrier N, Rolland N, Wacheul L, Manival X, et al. Synergistic defects in pre-rRNA processing from mutations in the U3-specific protein Rrp9 and U3 snoRNA. *Nucleic Acids Res*. 2020;48(7):3848–68.
18. Méreau A, Fournier R, Grégoire A, Mougin A, Fabrizio P, Lührmann R, et al. An in vivo and in vitro structure-function analysis of the *Saccharomyces cerevisiae* U3A snoRNP: Protein-RNA contacts and base-pair interaction with the pre-ribosomal RNA. *J Mol Biol*. 1997;273(3):552–71.
19. Watkins NJ, Bohnsack MT. The box C/D and H/ACA snoRNPs: key players in the modification, processing and the dynamic folding of ribosomal RNA: Box C/D and H/ACA snoRNPs. *Wiley Interdiscip Rev RNA* [Internet]. 2012;3(3):397–414. Available from: <http://doi.wiley.com/10.1002/wrna.117>

20. Kiss T, Fayet E, Jady BE, Richard P, Weber M. Biogenesis and Intranuclear Trafficking of Human Box C/D and H/ACA RNPs. Cold Spring Harb Symp Quant Biol. 2006;71(0):407-417 %U <http://symposium.cshlp.org/cgi/doi/10.1>.
21. Maden BE, Hughes JM. Eukaryotic ribosomal RNA: the recent excitement in the nucleotide modification problem. Chromosoma. 1997 Jun;105(7-8):391-400.
22. Decatur WA, Fournier MJ. rRNA modifications and ribosome function. Trends Biochem Sci. 2002 Jul;27(7):344-51.
23. Rodríguez-Galán O, García-Gómez JJ, de la Cruz J. Yeast and human RNA helicases involved in ribosome biogenesis: current status and perspectives. Biochim Biophys Acta [Internet]. 2013;1829(8):775-90. Available from: <http://www.ncbi.nlm.nih.gov/pubmed/23357782>
24. Kornprobst M, Turk M, Kellner N, Cheng J, Flemming D, Koš-Braun I, et al. Architecture of the 90S Pre-ribosome: A Structural View on the Birth of the Eukaryotic Ribosome. Cell [Internet]. 2016;166(2):380-93. Available from: <http://linkinghub.elsevier.com/retrieve/pii/S0092867416307437>
25. Wells GR, Weichmann F, Colvin D, Sloan KE, Kudla G, Tollervey D, et al. The PIN domain endonuclease Utp24 cleaves pre-ribosomal RNA at two coupled sites in yeast and humans. Nucleic Acids Res [Internet]. 2016;44(18):9016. Available from: <https://academic.oup.com/nar/article-lookup/doi/10.1093/nar/gkw645>
26. Horn DM, Mason SL, Karbstein K. Rcl1 Protein, a Novel Nuclease for 18 S Ribosomal RNA Production. J Biol Chem. 2011;286(39):34082-34087 %U <http://www.jbc.org/lookup/doi/10.10>.
27. Sloan KE, Gleizes P-E, Bohnsack MT. Nucleocytoplasmic Transport of RNAs and RNA-

Protein Complexes. J Mol Biol [Internet]. 2016;428(10):2040–59. Available from:

<http://linkinghub.elsevier.com/retrieve/pii/S002228361500546X>

28. Lamanna AC, Karbstein K. Nob1 binds the single-stranded cleavage site D at the 3'-end of 18S rRNA with its PIN domain. Proc Natl Acad Sci U S A. 2009;106(34):14259–64.

29. Oeffinger M, Zenklusen D, Ferguson A, Wei KE, El Hage A, Tollervey D, et al. Rrp17p Is a Eukaryotic Exonuclease Required for 5' End Processing of Pre-60S Ribosomal RNA. Mol Cell. 2009;36(5):768-781 %U <http://linkinghub.elsevier.com/retrieve>.

30. Henry Y, Wood H, Morrissey JP, Petfalski E, Kearsey S, Tollervey D. The 5' end of yeast 5.8S rRNA is generated by exonucleases from an upstream cleavage site. EMBO J. 1994 May;13(10):2452–63.

31. Allmang C. Functions of the exosome in rRNA, snoRNA and snRNA synthesis. EMBO J [Internet]. 1999;18(19):5399–410. Available from: <http://emboj.embopress.org/cgi/doi/10.1093/emboj/18.19.5399>

32. de la Cruz J. Dob1p (Mtr4p) is a putative ATP-dependent RNA helicase required for the 3' end formation of 5.8S rRNA in Saccharomyces cerevisiae. EMBO J [Internet]. 1998;17(4):1128–40. Available from: <http://emboj.embopress.org/cgi/doi/10.1093/emboj/17.4.1128>

33. Schuch B, Feigenbutz M, Makino DL, Falk S, Basquin C, Mitchell P, et al. The exosome□binding factors Rrp6 and Rrp47 form a composite surface for recruiting the Mtr4 helicase. EMBO J. 2014;33(23):2829–46.

34. El Hage A, Koper M, Kufel J, Tollervey D. Efficient termination of transcription by RNA polymerase I requires the 5' exonuclease Rat1 in yeast. Genes Dev. 2008;22(8):1069-1081 %U <http://www.genesdev.org/cgi/doi/10.11>.



35. Gasse L, Flemming D, Hurt E. Coordinated Ribosomal ITS2 RNA Processing by the Las1 Complex Integrating Endonuclease, Polynucleotide Kinase, and Exonuclease Activities. *Mol Cell* [Internet]. 2015;60(5):808–15. Available from: <http://linkinghub.elsevier.com/retrieve/pii/S1097276515008126>
36. Matsuo Y, Granneman S, Thoms M, Manikas R-G, Tollervey D, Hurt E. Coupled GTPase and remodelling ATPase activities form a checkpoint for ribosome export. *Nature* [Internet]. 2014;505(7481):112–6. Available from: <http://www.nature.com/articles/nature12731>
37. Sarkar A, Pech M, Thoms M, Beckmann R, Hurt E. Ribosome-stalk biogenesis is coupled with recruitment of nuclear-export factor to the nascent 60S subunit. *Nat Struct Mol Biol* [Internet]. 2016;23(12):1074–82. Available from: <http://www.nature.com/articles/nsmb.3312>
38. Ribbeck K. The permeability barrier of nuclear pore complexes appears to operate via hydrophobic exclusion. *EMBO J* [Internet]. 2002;21(11):2664–71. Available from: <http://emboj.embopress.org/cgi/doi/10.1093/emboj/21.11.2664>
39. Jr SLS. *Amoebiasis*. 2003;361:1025–34.
40. Sehgal D, Mittal V, Ramachandran S, Dhar SK, Bhattacharya A, Bhattacharya S. Nucleotide sequence organisation and analysis of the nuclear ribosomal DNA circle of the protozoan parasite *Entamoeba histolytica*. *Mol Biochem Parasitol* [Internet]. 1994;67(2):205–14. Available from: <http://linkinghub.elsevier.com/retrieve/pii/0166685194001294>
41. Bhattacharya S, Som I, Bhattacharya A. The Ribosomal DNA Plasmids of *Entamoeba*. *Parasitol Today* [Internet]. 1998;14(5):181–5. Available from:

<http://linkinghub.elsevier.com/retrieve/pii/S0169475898012228>

42. Jhingan GD, Panigrahi SK, Bhattacharya A, Bhattacharya S. The nucleolus in *Entamoeba histolytica* and *Entamoeba invadens* is located at the nuclear periphery. *Mol Biochem Parasitol.* 2009 Sep;167(1):72–80.
43. Ghosh S, Zaki M, Clark CG, Bhattacharya S. Recombinational loss of a ribosomal DNA unit from the circular episome of *Entamoeba histolytica* HM-1:IMSS. *Mol Biochem Parasitol.* 2001 Aug;116(1):105–8.
44. Michel B, Lizardi PM, Alagón A, Zurita M. Identification and analysis of the start site of ribosomal RNA transcription of *Entamoeba histolytica*. *Mol Biochem Parasitol.* 1995 Jul;73(1–2):19–30.
45. Sehgal D, Mittal V, Ramachandran S, Dhar SK, Bhattacharya A, Bhattacharya S, et al. Promoter Analysis of Palindromic Transcription Units in the Ribosomal DNA Circle of *Entamoeba histolytica*. *Mol Biochem Parasitol* [Internet]. 2009 Apr;28(1):205-214 %U <http://linkinghub.elsevier.com/retrieve>. Available from: <http://ec.asm.org/cgi/doi/10.1128/EC.00254-08>
46. Gupta AK, Panigrahi SK, Bhattacharya A, Bhattacharya S. Self-circularizing 5'-ETS RNAs accumulate along with unprocessed pre ribosomal RNAs in growth-stressed *Entamoeba histolytica*. *Sci Rep.* 2012;2:1–8.
47. Singh SS, Naiyer S, Bharadwaj R, Kumar A, Singh YP, Ray AK, et al. Stress-induced nuclear depletion of *Entamoeba histolytica* 3'-5' exoribonuclease EhRnp6 and its role in growth and erythrophagocytosis. *J Biol Chem* [Internet]. 2018;(0):jbc.RA118.004632. Available from: <http://www.jbc.org/lookup/doi/10.1074/jbc.RA118.004632>
48. Allmang C, Mitchell P, Petfalski E, Tollervey D. Degradation of ribosomal RNA

precursors by the exosome. *Nucleic Acids Res.* 2000 Apr;28(8):1684–91.

49. Lange H, Holec S, Cognat V, Pieuchot L, Le Ret M, Canaday J, et al. Degradation of a polyadenylated rRNA maturation by-product involves one of the three RRP6-like proteins in *Arabidopsis thaliana*. *Mol Cell Biol.* 2008 May;28(9):3038–44.

50. Farley-Barnes KI, McCann KL, Ogawa LM, Merkel J, Surovtseva Y V., Baserga SJ. Diverse Regulators of Human Ribosome Biogenesis Discovered by Changes in Nucleolar Number. *Cell Rep [Internet].* 2018;22(7):1923–34. Available from: <https://doi.org/10.1016/j.celrep.2018.01.056>

51. Tafforeau L, Zorbas C, Langhendries JL, Mullineux ST, Stamatopoulou V, Mullier R, et al. The complexity of human ribosome biogenesis revealed by systematic nucleolar screening of pre-rRNA processing factors. *Mol Cell [Internet].* 2013;51(4):539–51. Available from: <http://dx.doi.org/10.1016/j.molcel.2013.08.011>

52. Naiyer S. BMC Genomics Transcriptomic analysis reveals novel downstream regulatory motifs and highly transcribed virulence factor genes of *Entamoeba histolytica*. 2019;

53. Naiyer S, Bhattacharya A, Bhattacharya S. Advances in *entamoeba histolytica* biology through transcriptomic analysis. *Front Microbiol.* 2019;10(AUG).

54. Tovar J, Fischer A, Clark CG. The mitosome, a novel organelle related to mitochondria in the amitochondrial parasite *Entamoeba histolytica*. *Mol Microbiol.* 1999;32(5):1013–21.

55. Kazama M, Ogiwara S, Makiuchi T, Yoshida K, Nakada-Tsukui K, Nozaki T, et al. Behavior of DNA-lacking mitochondria in *Entamoeba histolytica* revealed by organelle transplant. *Sci Rep.* 2017;7(August 2016):1–10.

56. Fatica A, Cronshaw AD, Dlakić M, Tollervey D. Ssf1p Prevents Premature Processing of an Early Pre-60S Ribosomal Particle. *Mol Cell.* 2002;9(2):341-351 %U

<http://linkinghub.elsevier.com/retrieve>.

57. Nagarajan VK, Jones CI, Newbury SF, Green PJ. XRN 5'→3' exoribonucleases: Structure, mechanisms and functions. *Biochim Biophys Acta - Gene Regul Mech* [Internet]. 2013;1829(6–7):590–603. Available from: <http://dx.doi.org/10.1016/j.bbagr.2013.03.005>
58. Luo W, Johnson AW, Bentley DL. The role of Rat1 in coupling mRNA 3'-end processing to transcription termination: Implications for a unified allosteric-torpedo model. *Genes Dev*. 2006;20(8):954–65.
59. Tesina P, Heckel E, Cheng J, Fromont-Racine M, Buschauer R, Kater L, et al. Structure of the 80S ribosome–Xrn1 nuclease complex. *Nat Struct Mol Biol* [Internet]. 2019;26(4):275–80. Available from: <http://dx.doi.org/10.1038/s41594-019-0202-5>
60. Krzyszton M, Zakrzewska-Placzek M, Koper M, Kufel J. Rat1 and Xrn2: The Diverse Functions of the Nuclear Rat1/Xrn2 Exonuclease. *Enzym*. 2012;31:131–63.
61. Piccinelli P, Rosenblad MA, Samuelsson T. Identification and analysis of ribonuclease P and MRP RNA in a broad range of eukaryotes. *Nucleic Acids Res*. 2005;33(14):4485–95.
62. Ebersberger I, Simm S, Leisegang MS, Schmitzberger P, Mirus O, Von Haeseler A, et al. The evolution of the ribosome biogenesis pathway from a yeast perspective. *Nucleic Acids Res*. 2014;42(3):1509–23.
63. Rosenblad MA, López MD, Piccinelli P, Samuelsson T. Inventory and analysis of the protein subunits of the ribonucleases P and MRP provides further evidence of homology between the yeast and human enzymes. *Nucleic Acids Res*. 2006;34(18):5145–56.
64. Zhu Y, Stribinskis V, Ramos KS, Li Y. Sequence analysis of RNase MRP RNA reveals its origination from eukaryotic RNase P RNA. *Vol. 12, Rna*. 2006. p. 699–706.

65. Mitchell P, Petfalski E, Tollervey D. The 3' end of yeast 5.8S rRNA is generated by an exonuclease processing mechanism. *Genes Dev.* 1996;10(4):502-513 %U <http://www.genesdev.org/cgi/doi/10.1101>.
66. Loria A, Pan T. Domain structure of the ribozyme from eubacterial ribonuclease P. Vol. 2, *Rna*. 1996. p. 551–63.
67. Martin AN, Li Y. RNase MRP RNA and human genetic diseases. *Cell Res.* 2007;17(3):219–26.
68. Lan P, Zhou B, Tan M, Li S, Cao M, Wu J, et al. Structural insight into precursor ribosomal RNA processing by ribonuclease MRP. *Science* (80- ). 2020;0149(June):eabc0149.
69. Kaur D, Gupta AK, Kumari V, Sharma R, Bhattacharya A, Bhattacharya S. Computational prediction and validation of C/D, H/ACA and Eh\_U3 snoRNAs of *Entamoeba histolytica*. *BMC Genomics*. 2012;13(1).
70. Pillon MC, Sobhany M, Stanley RE. Characterization of the molecular crosstalk within the essential Grc3/Las1 pre-rRNA processing complex. Vol. 24, *Rna*. 2018. p. 721–38.
71. Wang M, Pestov DG. 5'-end surveillance by Xrn2 acts as a shared mechanism for mammalian pre-rRNA maturation and decay. *Nucleic Acids Res.* 2011;39(5):1811–22.
72. Schäfer T, Maco B, Petfalski E, Tollervey D, Böttcher B, Aebi U, et al. Hrr25-dependent phosphorylation state regulates organization of the pre-40S subunit. *Nature*. 2006;441(7093):651-655 %U <http://www.nature.com/articles/nature04>.
73. Zhao Y, Sohn J-H, Warner JR. Autoregulation in the Biosynthesis of Ribosomes. *Mol Cell Biol.* 2003;23(2):699–707.
74. Moss T. At the crossroads of growth control; making ribosomal RNA. *Curr Opin Genet*

Dev. 2004;14(2):210-217 %U <http://linkinghub.elsevier.com/retrieve>.

75. Brandman O, Stewart-Ornstein J, Wong D, Larson A, Williams CC, Li GW, et al. A ribosome-bound quality control complex triggers degradation of nascent peptides and signals translation stress. *Cell* [Internet]. 2012;151(5):1042–54. Available from: <http://dx.doi.org/10.1016/j.cell.2012.10.044>

76. Huber M, Koller B, Gitler C, Mirelman D, Revel M, Rozenblatt S, et al. *Entamoeba histolytica* ribosomal RNA genes are carried on palindromic circular DNA molecules. *Mol Biochem Parasitol*. 1989;32(2–3):285-296 %U <http://linkinghub.elsevier.com/retrieve>.

77. Marion RM, Regev A, Segal E, Barash Y, Koller D, Friedman N, et al. Sfp1 is a stress- and nutrient-sensitive regulator of ribosomal protein gene expression. *Proc Natl Acad Sci U S A*. 2004;101(40):14315–22.

78. Gerashchenko M V., Lobanov A V., Gladyshev VN. Genome-wide ribosome profiling reveals complex translational regulation in response to oxidative stress. *Proc Natl Acad Sci U S A*. 2012;109(43):17394–9.

79. Yuan X, Zhao J, Zentgraf H, Hoffmann-Rohrer U, Grummt I. Multiple interactions between RNA polymerase I, TIF-IA and TAFI subunits regulate preinitiation complex assembly at the ribosomal gene promoter. *EMBO Rep*. 2002;3(11):1082–7.

80. Martin R, Straub AU, Doebele C, Bohnsack MT. DExD/H-box RNA helicases in ribosome biogenesis. *RNA Biol* [Internet]. 2013;10(1):4–18. Available from: <http://www.tandfonline.com/doi/abs/10.4161/rna.21879>

81. Armistead J, Triggs-Raine B. Diverse diseases from a ubiquitous process: the ribosomopathy paradox. *FEBS Lett* [Internet]. 2014/03/25. 2014;588(9):1491–500. Available from: <https://www.ncbi.nlm.nih.gov/pubmed/24657617>

82. Brüning L, Hackert P, Martin R, Davila Gallesio J, Aquino GRR, Urlaub H, et al. RNA helicases mediate structural transitions and compositional changes in pre-ribosomal complexes. *Nat Commun* [Internet]. 2018;9(1). Available from: <http://dx.doi.org/10.1038/s41467-018-07783-w>
83. Kos-Braun IC, Jung I, Ko?? M. Tor1 and CK2 kinases control a switch between alternative ribosome biogenesis pathways in a growth-dependent manner. *PLoS Biol*. 2017;15(3).
84. Wurm JP, Meyer B, Bahr U, Held M, Frolow O, Kötter P, et al. The ribosome assembly factor Nep1 responsible for Bowen-Conradi syndrome is a pseudouridine-N1-specific methyltransferase. *Nucleic Acids Res*. 2010;38(7):2387–98.
85. Dong J, Lai R, Jennings JL, Link AJ, Hinnebusch AG. The Novel ATP-Binding Cassette Protein ARB1 Is a Shuttling Factor That Stimulates 40S and 60S Ribosome Biogenesis. *Mol Cell Biol*. 2005;25(22):9859-9873 %U <http://mcb.asm.org/cgi/doi/10.1128/MC>.
86. Ahamad J, Ojha S, Srivastava A, Bhattacharya A, Bhattacharya S. Post-transcriptional regulation of ribosomal protein genes during serum starvation in *Entamoeba histolytica*. *Mol Biochem Parasitol* [Internet]. 2015;201(2):146–52. Available from: <http://dx.doi.org/10.1016/j.molbiopara.2015.07.006>
87. Meyer B, Wurm JP, Sharma S, Immer C, Pogoryelov D, Kötter P, et al. Ribosome biogenesis factor Tsr3 is the aminocarboxypropyl transferase responsible for 18S rRNA hypermodification in yeast and humans. *Nucleic Acids Res*. 2016;44(9):4304–16.
88. Diamond LS, Harlow DR, Cunnick CC. A new medium for the axenic cultivation of *entamoeba histolytica* and other *entamoeba*. *Trans R Soc Trop Med Hyg*. 1978;
89. Li B, Dewey CN. RSEM□: accurate transcript quantification from RNA-Seq data with or

704 without a reference genome. 2011;

705

706



**Table 1: Ribosome biogenesis factors and their expression status in *E. histolytica***

| Classes of proteins involved in various steps of ribosome biogenesis |                                           | No of genes in Sc | No of genes in Eh | Expression level (VH,H>M>VL,L>A) |
|----------------------------------------------------------------------|-------------------------------------------|-------------------|-------------------|----------------------------------|
| <b>SnoRNPs</b>                                                       | Box C/D                                   | 4                 | 5                 | 03>2>0>0                         |
|                                                                      | Box H/ACA                                 | 6                 | 8                 | 07>1>0>0                         |
| <b>90s particles</b>                                                 | U3 snoRNA associated proteins             | 30                | 27                | 0>24>2>1                         |
|                                                                      | Helicase                                  | 9                 | 18                | 1>13>03>1                        |
|                                                                      | RNase                                     | 1                 | 1                 | 0>0>0>1                          |
|                                                                      | GTPase                                    | 3                 | 1                 | 0>1>0>0                          |
|                                                                      | Kinase                                    | 4                 | 6                 | 0>5>0>1                          |
|                                                                      | Other 90S particle                        | 22                | 20                | 0>13>5>2                         |
| <b>Pre-40S particles</b>                                             | Kinases                                   | 3                 | 7                 | 0>6>1>0                          |
|                                                                      | Export and cytoplasmic maturation factors | 20                | 22                | 1>17>4>0                         |
|                                                                      | Other pre-40S particles                   | 6                 | 13                | 2>7>3>1                          |
| <b>Pre-60S particles</b>                                             | Helicase                                  | 11                | 13                | 0>11>2>0                         |
|                                                                      | RNase                                     | 15                | 5                 | 0>5>0>0                          |
|                                                                      | GTPase                                    | 5                 | 7                 | 3>4>0>0                          |
|                                                                      | Kinase                                    | 2                 | --                |                                  |
|                                                                      | Export and cytoplasmic maturation factors | 22                | 23                | 3>11>4>5                         |
|                                                                      | 5-FMC complex                             | 3                 | 2                 | 0>2>0>0                          |
|                                                                      | Other pre-60S particle                    | 52                | 39                | 2>34>3>0                         |
| <b>Other ribosome biogenesis factors</b>                             |                                           | 13                | 6                 | 0>6>0>0                          |
| <b>Miscellaneous proteins</b>                                        |                                           | 54                | 41                | 15>22>0>4>0                      |

\*VH, very high; H, high; M, medium; L, low; A, absent.

**Table 2: *S. cerevisiae* ribosome biogenesis proteins with no homologues in *E. histolytica***

|                | Gene family         | Gene name | Accession Number | Human  | Functions in <i>S. cerevisiae</i>                                   |
|----------------|---------------------|-----------|------------------|--------|---------------------------------------------------------------------|
| <b>SnoRNPs</b> | <b>Box H&gt;ACA</b> | NAF1      | KZV08498         | Q96HR8 | RNA-binding protein required for the assembly of box H>ACA snoRNPs. |

|                            |                                                   |                          |                                          |        |                                                                                                                                                                |
|----------------------------|---------------------------------------------------|--------------------------|------------------------------------------|--------|----------------------------------------------------------------------------------------------------------------------------------------------------------------|
|                            | <b>snoRNPs</b>                                    |                          |                                          |        |                                                                                                                                                                |
| <b>90S particles</b>       | <b>U3 small nucleolar RNA-associated proteins</b> | RRP7                     | KZV12820                                 | ----   | Along with Utp22 conducts early processing of 18S rRNA, binds at the central domain of 18S rRNA.                                                               |
|                            |                                                   | NOP14                    | KZV12078                                 | P78316 | Interacts with EMG1 protein for 18S rRNA maturation and 40S ribosome production.                                                                               |
|                            |                                                   | SAS10                    | KZV12073                                 | Q9NQZ2 | Dock other proteins to the nucleic acid substrate, binds Mpp10 protein.                                                                                        |
|                            |                                                   | UTP8                     | KZV11358                                 | ----   | Forms complex with amino acyl tRNA synthetase and translocate it from nucleolus to nuclear export receptors, helps processing of 35S pre-rRNA to 18S pre-rRNA. |
|                            |                                                   | UTP9                     | KZV10940                                 | ----   | Bind the ssu processosome directly without utp8.                                                                                                               |
|                            |                                                   | BUD21                    | KZV07967                                 | ----   | Component of ssu processosome complex, involved in nucleolar processing of 18S pre-rRNA.                                                                       |
|                            |                                                   | UTP30                    | KZV10001                                 | ----   | Putative subunit of U3-containing 90S pre-ribosome complex, involved in production of 18S rRNA and assembly of small ribosomal subunit.                        |
|                            | <b>RNase</b>                                      | RNT1                     | KZV09092                                 | ----   | Ribonuclease (RNase III), involved in rRNA processing and U2 snRNA 3' end formation, cleaves pre-rRNA at A0 site in the 5'-ETS and 3'-ETS.                     |
|                            |                                                   | REX4                     | KZV07802                                 | ----   | Putative RNA exonuclease; possibly involved in pre-rRNA processing and ribosome assembly.                                                                      |
| <b>Other 90S particles</b> |                                                   | CIC1                     | KZV10776                                 | ----   | Required for synthesis and nuclear export of 60S ribosomal subunits.                                                                                           |
|                            |                                                   | CMS1 YLR003C             | KZV09250                                 | ----   | Putative subunit of the 90S pre-ribosome processosome complex.                                                                                                 |
|                            |                                                   | KRI1                     | KZV08317                                 | Q8N9T8 | Essential nucleolar protein required for 40S ribosome biogenesis, associate with snR30 and Krr1p.                                                              |
|                            |                                                   | NOP6                     | KZV12009                                 | ----   | rRNA binding protein required for 40S ribosomal subunit biogenesis, contains an RRM.                                                                           |
|                            |                                                   | NOP9                     | KZV10262                                 | Q86U38 | Essential subunit of U3-containing 90S pre-ribosome, involved in production of 18S rRNA and assembly of small ribosomal subunit, part of pre-40S ribosome.     |
|                            |                                                   | PXR1                     | KZV11514                                 | P50542 | Involved in rRNA-processing at A0, A1 and A2 sites through its action in U18 and U24 snoRNA 3'-end trimming.                                                   |
|                            |                                                   | RRP36                    | KZV08174                                 | Q96EU6 | Component of 90S pre-ribosomes, involved in early cleavages of the 35S pre-rRNA and in production of the 40S ribosomal subunit.                                |
|                            |                                                   | TMA23                    | KZV09123                                 | ----   | Nucleolar protein implicated in ribosome biogenesis.                                                                                                           |
|                            |                                                   | <b>Pre-40S particles</b> | <b>Export and cytoplasmic maturation</b> | LTV1   | KZV09794                                                                                                                                                       |
| SXM1                       | KZV12639                                          |                          |                                          | ----   | Nuclear transport factor (karyopherin).                                                                                                                        |

|                               |                                                  |                 |          |        |                                                                                                                                                                             |
|-------------------------------|--------------------------------------------------|-----------------|----------|--------|-----------------------------------------------------------------------------------------------------------------------------------------------------------------------------|
|                               | <b>factor</b>                                    | KAP114          | KZV10987 | ----   | Karyopherin, responsible for nuclear import of specific proteins.                                                                                                           |
| <b>Other pre-40S particle</b> |                                                  | HCR1            | KZV09436 | ----   | eIF3j component of translation initiation factor 3 (eIF3), required for 20S pre-rRNA processing; binds eIF3 subunits Rpg1p, Prt1p and 18S rRNA                              |
|                               |                                                  | SLX9            | KZV11307 | ----   | Associated with 90S pre-ribosome and 43S small ribosomal subunit, interacts with U3 snoRNA.                                                                                 |
| <b>Pre-60S particles</b>      | <b>RNase</b>                                     | NGL2            | KZV09140 | ----   | Involved in 5.8S rRNA processing, required for correct 3'-end formation of 5.8S rRNA at site E.                                                                             |
|                               |                                                  | REX2            | KZV09305 | ----   | 3'-5' RNA exonuclease, involved in 3'-end processing of U4>U5 snRNAs, 5S and 5.8S rRNAs, and RNase P and RNase MRP RNA.                                                     |
|                               |                                                  | RNH70           | KZV11510 | ----   | 3' exoribonuclease required for 5S rRNA maturation, along with REX2 helps maturation of the 5.8S rRNA                                                                       |
|                               | <b>Rnase MRP</b>                                 | POP3            | KZV08343 | Q9HBV1 | Required for processing of 5.8S rRNA at site A3 and for 5' and 3' processing of pre-tRNA.                                                                                   |
|                               |                                                  | POP4            | KZV13345 | O95707 | Subunit of RNase MRP and nuclear RNase P, RNase MRP cleaves pre-rRNA, while nuclear RNase P cleaves tRNA precursors to generate mature 5' ends.                             |
|                               |                                                  | POP5            | KZV13434 | Q969H6 | Component of RNase MRP, which cleaves pre-rRNA sequences.                                                                                                                   |
|                               |                                                  | POP6            | KZV11255 | ----   | Subunit of RNase MRP, nuclear RNase P and telomerase; forms a soluble heterodimer with Pop7p that binds P3 domain of RNase MRP and RNase P RNAs; RNase MRP cleaves pre-rRNA |
|                               |                                                  | POP7            | KZV13248 | O75817 | Subunit of RNase MRP, nuclear RNase P and telomerase; forms a soluble heterodimer with Pop6p that binds P3 domain of RNase MRP and RNase P RNAs.                            |
|                               |                                                  | POP8            | KZV13053 | ----   | Component of RNase MRP, which cleaves pre-rRNA sequences.                                                                                                                   |
|                               |                                                  | RMP1            | KZV09389 | ----   | Subunit of ribonuclease MRP, which is involved in rRNA processing in mitochondria.                                                                                          |
|                               |                                                  | SNM1<br>YDR478W | KZV12719 | ----   | Ribonuclease MRP complex subunit.                                                                                                                                           |
|                               | <b>Kinase</b>                                    | GRC3            | KZV09214 | ----   | Polynucleotide kinase present on rDNA, required for efficient transcription termination by RNA polymerase I, functions with Las1p to modulate ribosome biogenesis.          |
|                               | <b>Export and cytoplasmic maturation factors</b> | ARX1            | KZV12343 | ----   | Nuclear export factor for the ribosomal pre-60S subunit, facilitates translocation through the nuclear pore complex                                                         |
|                               |                                                  | ALB1            | KZV10155 | ----   | Shuttling pre-60S factor; involved in the biogenesis of ribosomal large subunit, interacts directly with Arx1p.                                                             |
|                               |                                                  | SSA1            | KZV13464 | P19474 | ATPase involved in protein folding and NLS-directed nuclear transport,                                                                                                      |

|                                |  |       |          |        |                                                                                                                                                                                                   |
|--------------------------------|--|-------|----------|--------|---------------------------------------------------------------------------------------------------------------------------------------------------------------------------------------------------|
|                                |  |       |          |        | member of HSP70 family.                                                                                                                                                                           |
|                                |  | SSA4  | KZV11871 | ----   | highly induced upon stress, plays a role in SRP-dependent co-translational protein-membrane targeting and translocation.                                                                          |
|                                |  | SSA3  | KZV12991 | ----   | ATPase involved in protein folding and the response to stress, plays a role in SRP-dependent co-translational protein-membrane targeting and translocation.                                       |
|                                |  | SSB2  | KZV08414 | Q99619 | Cytoplasmic ATPase that is a ribosome-associated molecular chaperone, functions with J-protein partner Zuo1p, may be involved in the folding of newly-synthesized polypeptide chains.             |
|                                |  | MTR2  | KZV09748 | Q8IYT2 | mRNA transport regulator, Mex67p and Mtr2p form a mRNA export complex.                                                                                                                            |
|                                |  | MEX67 | KZV07345 | ----   | Poly(A)RNA binding protein involved in nuclear mRNA export; component of the nuclear pore                                                                                                         |
|                                |  | LOC1  | KZV11600 | ----   | Required for efficient assembly and nuclear export of the 60S ribosomal subunit.                                                                                                                  |
|                                |  | SQT1  | KZV10631 | ----   | May be involved in the late step of 60S ribosomal subunit assembly or modification in the cytoplasm.                                                                                              |
| <b>5-FMC Complex</b>           |  | IPI1  | KZV10820 | ----   | Component of the Rix1 complex and possibly pre-replicative complexes, required for processing of ITS2, component of the pre-60S ribosomal particle with the dynein-related AAA-type ATPase Mdn1p. |
| <b>Other pre-60S particles</b> |  | BUD20 | KZV09320 | ----   | C2H2-type zinc finger protein required for ribosome assembly, shuttling factor which associates with pre-60S particles in the nucleus.                                                            |
|                                |  | CIC1  | KZV10776 | ----   | Required for synthesis and nuclear export of 60S ribosomal subunits.                                                                                                                              |
|                                |  | CGR1  | KZV11196 | ----   | Protein involved in nucleolar integrity and processing of pre-rRNA, transcript is induced in response to cytotoxic stress.                                                                        |
|                                |  | MAK11 | P20484   | ----   | Protein involved in an early step of 60S ribosomal subunit biogenesis.                                                                                                                            |
|                                |  | NOP8  | Q08287   | ----   | Required for 60S ribosomal subunit synthesis.                                                                                                                                                     |
|                                |  | NOP16 | KZV11750 | Q9Y3C1 | Constituent of 66S pre-ribosomal particles, involved in 60S ribosomal subunit biogenesis.                                                                                                         |
|                                |  | NOP53 | KZV07369 | Q9NZM5 | Nucleolar protein, involved in biogenesis of the 60S subunit of the ribosome, interacts with rRNA processing factors Cbf5p and Nop2p and with the nucleolar proteins Nop17p and Nip7p.            |
|                                |  | NSA1  | KZV11117 | Q6RFH5 | Constituent of 66S pre-ribosomal particles, involved in 60S ribosomal subunit biogenesis.                                                                                                         |
|                                |  | RAI1  | KZV10982 | Q7Z5J4 | Targets mRNAs with unmethylated 7-methylguanosine cap structures and 5'-triphosphates, binds and stabilizes the exoribonuclease Rat1p.                                                            |

|                                          |       |          |        |                                                                                                                                                                  |
|------------------------------------------|-------|----------|--------|------------------------------------------------------------------------------------------------------------------------------------------------------------------|
|                                          | RIX1  | KZV10941 | ----   | Component of the Rix1 complex required for processing of ITS2 sequences from 35S pre-rRNA.                                                                       |
|                                          | RRP1  | KZV12324 | P05386 | Necessary for biogenesis of 60S ribosomal subunits and for processing of pre-rRNAs to mature rRNA, associated with several distinct 66S pre-ribosomal particles. |
|                                          | RRP17 | KZV12656 | Q96S79 | Component of pre-60S ribosomal particle, exonuclease required for 5' end processing of pre-60S rRNA.                                                             |
|                                          | RSA1  | KZV07319 | ----   | Protein involved in the assembly of 60S ribosomal subunits, functionally interacts with Dbp6p.                                                                   |
|                                          | RSA3  | KZV09463 | ----   | Required for accumulation of wild-type levels of large (60S) ribosomal subunits, binds to the helicase Dbp6p in pre-60S ribosomal particles in the nucleolus.    |
|                                          | SRD1  | KZV12864 | ----   | Protein involved in the processing of pre-rRNA to mature rRNA, contains a C2>C2 zinc finger motif.                                                               |
|                                          | TMA16 | KZV08139 | Q96EY4 | Protein of unknown function that associates with ribosomes.                                                                                                      |
|                                          | URB1  | KZV09928 | O60287 | Associated with the 27SA2 pre-ribosomal particle, proposed to be involved in the biogenesis of the 60S ribosomal subunit                                         |
|                                          | URB2  | KZV10308 | Q14146 | Protein required for normal metabolism of the rRNA primary transcript, nucleolar protein.                                                                        |
| <b>Other ribosome biogenesis factors</b> | BCP1  | KZV12601 | ----   | Involved in nuclear export of the lipid kinase MSS4 and of the 60S ribosomal subunit.                                                                            |
|                                          | MTF1  | KZV09080 | Q14872 | Although strongly related to dimethyladenosine transferase proteins, it lacks the methyltransferase activity.                                                    |
|                                          | MRM1  | KZV08091 | Q6IN84 | Catalyzes the formation of 2'-O-methylguanosine in mitochondrial ribosomal RNA.                                                                                  |
|                                          | BMT2  | KZV13221 | Q1RMZ1 | Methylation of the N1 position of adenine 2142 in 25S rRNA.                                                                                                      |
|                                          | BMT5  | KZV10521 | ----   | Methylation of the 25S rRNA, associates with precursors of the 60S ribosomal subunit.                                                                            |
|                                          | BMT6  | KZV09309 | ----   | Methylation of the 25S rRNA.                                                                                                                                     |
|                                          | MTG1  | KZV08938 | Q9BT17 | Mitochondrial GTPase involved in assembly of the large ribosomal subunit.                                                                                        |
| <b>Miscellaneous Proteins</b>            | GEP3  | KZV08094 | ----   | Required for mitochondrial ribosome small subunit biogenesis.                                                                                                    |
|                                          | RSC9  | KZV08711 | ----   | Component of RSC chromatin remodeling complex, involved in the synthesis of rRNA.                                                                                |
|                                          | CBT1  | KZV09728 | ----   | Protein involved in 5' RNA end processing, substrates include mitochondrial COB.                                                                                 |
|                                          | CSL4  | KZV08391 | Q9Y3B2 | Exosome non-catalytic core component, involved in 3'-5' RNA processing                                                                                           |

|  |       |          |        |                                                                                                                                                                               |
|--|-------|----------|--------|-------------------------------------------------------------------------------------------------------------------------------------------------------------------------------|
|  |       |          |        | and degradation in both the nucleus and the cytoplasm.                                                                                                                        |
|  | RRP42 | KZV12118 | Q15024 | Exosome non-catalytic core component, involved in 3'-5' RNA processing and degradation in both the nucleus and the cytoplasm.                                                 |
|  | RRP43 | KZV12884 | Q96B26 | Exosome non-catalytic core component, involved in 3'-5' RNA processing and degradation in both the nucleus and the cytoplasm.                                                 |
|  | LRP1  | KZV10816 | Q07954 | Nuclear exosome-associated nucleic acid binding protein, involved in RNA processing, surveillance, degradation, tethering, and export, forms a stable heterodimer with Rrp6p. |
|  | MPP6  | KZV08651 | Q9NZW5 | Nuclear exosome-associated RNA binding protein, involved in surveillance of pre-rRNAs and pre-mRNAs, and the degradation of cryptic non-coding RNAs (ncRNA).                  |
|  | NPL3  | KZV12675 | ----   | RNA-binding protein                                                                                                                                                           |
|  | FHL1  | KZV07616 | Q13642 | Regulator of ribosomal protein (RP) transcription, recruits coactivator Ifh1p or corepressor Crf1p to RP gene promoters.                                                      |
|  | FAF1  | KZV10599 | Q9UNN5 | Protein required for pre-rRNA processing, and 40S ribosomal subunit assembly.                                                                                                 |
|  | IFH1  | KZV09465 | ----   | Coactivator, regulates transcription of ribosomal protein (RP) genes, recruited to RP gene promoters during optimal growth conditions via Fhl1p, subunit of CURI.             |
|  | PIH1  | KZV10756 | ----   | Component of the conserved R2TP complex, interacts with Hsp90 to mediate assembly large protein complexes such as box C>D snoRNPs and RNA polymerase II.                      |
|  | RTC3  | KZV10823 | ----   | May play a role in RNA metabolism, rRNA-processing, and in a process influencing telomere capping.                                                                            |
|  | RRP15 | Q06511   | Q9Y3B9 | Required for processing of the 27S pre-rRNA at A3 and B1 sites to yield mature 5.8S and 25S rRNAs.                                                                            |
|  | REX3  | KZV09354 | ----   | RNA exonuclease, required for maturation of the RNA component of RNase MRP.                                                                                                   |
|  | EFG1  | KZV11506 | ----   | Essential protein required for maturation of 18S rRNA.                                                                                                                        |
|  | FCF2  | KZV09297 | ----   | Nucleolar protein involved in the early steps of 35S rRNA processing, interacts with Faf1p.                                                                                   |
|  | FYV7  | KZV09314 | ----   | Essential protein required for maturation of 18S rRNA.                                                                                                                        |
|  | SBP1  | KZV10682 | Q13228 | Binds eIF4G and has a role in repression of translation, binds to mRNAs under glucose starvation stress, associates with snoRNAs snR10 and snR11.                             |
|  | LSM6  | KZV12620 | P62312 | Involved in mRNA decay.                                                                                                                                                       |

**Table 3: *E. histolytica* genes which match multiple *S. cerevisiae* genes**

|                      |                                               |            |                         |                                                    |
|----------------------|-----------------------------------------------|------------|-------------------------|----------------------------------------------------|
| <b>SnoRNPs</b>       | <b>Box C&gt;D<br/>snoRNPs</b>                 | EHI_053440 | SNU13, YEL026W          | 13 kDa ribonucleoprotein-associated protein        |
|                      |                                               |            | NHP2, YDL208W           |                                                    |
| <b>90S particles</b> | <b>U3 snoRNA-<br/>associated<br/>proteins</b> | EHI_056460 | UTP23, YOR004W          | Hypothetical protein                               |
|                      |                                               |            | FCF1, UTP24, YDR339C    |                                                    |
|                      | <b>Kinase</b>                                 | EHI_075700 | CKB1, YGL019W           | Casein kinase II regulatory subunit family protein |
|                      |                                               |            | CKB2, YOR039W, OR26.33  |                                                    |
|                      |                                               | EHI_152350 | CKB1, YGL019W           |                                                    |
|                      |                                               |            | CKB2, YOR039W, OR26.32  |                                                    |
|                      |                                               | EHI_030840 | CKB1, YGL019W           |                                                    |
|                      |                                               |            | CKB2, YOR039W, OR26.34  |                                                    |
|                      |                                               | EHI_035250 | CKB1, YGL019W           |                                                    |
|                      |                                               |            | CKB2, YOR039W, OR26.35  |                                                    |
|                      |                                               | EHI_006800 | CKA1, YIL035C           | Casein kinase                                      |
|                      |                                               |            | CKA2, YOR061W, YOR29-12 |                                                    |
|                      |                                               | EHI_038670 | CKA1, YIL035C           | Protein kinase domain containing protein           |
|                      |                                               |            | CKA2, YOR061W, YOR29-13 |                                                    |
|                      | <b>Helicases</b>                              | EHI_077640 | PRP43, YGL120C          | ATP-dependent helicase                             |
|                      |                                               |            | ECM16, DHR1, YMR128W    |                                                    |
|                      |                                               | EHI_096230 | PRP43, YGL120C          |                                                    |
|                      |                                               |            | DHR2, YKL408, YKL078W   |                                                    |
|                      |                                               | EHI_096390 | ROK1, YGL171W, G1652    | DEAD>DEAH box helicase                             |
|                      |                                               |            | DBP2, YNL112W, N1945    |                                                    |
|                      |                                               |            | DRS1, YLL008W           |                                                    |
|                      |                                               |            | DBP3, YGL078C           |                                                    |
|                      |                                               | EHI_122790 | PRP43, YGL120C          |                                                    |
|                      |                                               |            | DHR2, YKL408, YKL078W   |                                                    |
|                      |                                               | EHI_148930 | PRP43, YGL120C          |                                                    |
|                      |                                               |            | DHR2, YKL408, YKL078W   |                                                    |
|                      |                                               | EHI_184530 | PRP43, YGL120C          |                                                    |
|                      |                                               |            | DHR2, YKL408, YKL078W   |                                                    |

|                     |                                           |                                                                             |                                         |                                                             |                                             |                        |               |  |
|---------------------|-------------------------------------------|-----------------------------------------------------------------------------|-----------------------------------------|-------------------------------------------------------------|---------------------------------------------|------------------------|---------------|--|
|                     |                                           | EHI_014080                                                                  | PRP43, YGL120C<br>DHR2, YKL408,YKL078W  |                                                             |                                             |                        |               |  |
|                     |                                           | EHI_033720                                                                  | PRP43, YGL120C<br>DHR2, YKL408,YKL078W  |                                                             |                                             |                        |               |  |
| Other 90S particles |                                           | EHI_014120                                                                  | MRD1, YPR112C<br>NOP15, YNL110C, N1954  | RNA recognition motif domain containing protein             |                                             |                        |               |  |
| Pre-60S particles   | Export and cytoplasmic maturation factors | EHI_154230                                                                  | REI1, YBR267W, YBR1736<br>REH1, YLR387C | Zinc finger protein 622                                     |                                             |                        |               |  |
|                     |                                           | EHI_045120                                                                  | AFG2, YLR397C,<br>RIX7, YLL034C         | Cell division cycle protein 48                              |                                             |                        |               |  |
|                     |                                           | GTPase                                                                      | EHI_164370                              | NUG1, YER006W<br>NOG2, YNR053C, N3484,NUG2                  | GTPase                                      |                        |               |  |
|                     |                                           |                                                                             | Helicases                               | EHI_165110                                                  | DBP7, YKR024C<br>DBP6, YNR038W, N3303       | DEAD>DEAH box helicase |               |  |
|                     | EHI_169630                                | HAS1, YMR290C<br>DRS1, YLL008W<br>DBP6, YNR038W, N3306                      |                                         |                                                             |                                             |                        |               |  |
|                     | EHI_175030                                | ROK1, YGL171W, G1651<br>DRS1, YLL008W<br>DBP3, YGL078C                      |                                         |                                                             |                                             |                        |               |  |
|                     | EHI_069410                                | DRS1, YLL008W<br>DBP10, YDL031W, D2770                                      |                                         |                                                             |                                             |                        |               |  |
|                     | EHI_111040                                | RRP3, YHR065C<br>DBP8, YHR169W                                              |                                         |                                                             |                                             |                        |               |  |
|                     |                                           | DRS1, YLL008W<br>DBP6, YNR038W, N3304                                       |                                         |                                                             |                                             |                        |               |  |
|                     | EHI_119620                                | HCA4, DBP4, J1250, ECM24, YJL033W,<br>DRS1, YLL008W<br>DBP6, YNR038W, N3305 |                                         |                                                             |                                             |                        |               |  |
|                     | RNase                                     | EHI_133330                                                                  |                                         | XRN1,DST2,KEM1, RAR5,SEP1,SKI1<br>RAT1, HKE1, TAP1, YOR048C | 5'-3' exonuclease domain containing protein |                        |               |  |
|                     |                                           | Other pre-60S particles                                                     |                                         | EHI_004900                                                  | IMP4, YNL075W, N2353<br>RPF1, YHR088W       |                        | U3 snRNP IMP4 |  |
|                     |                                           | EHI_012190                                                                  |                                         | SSF1, YHR066W<br>SSF2, YDR312W                              | Brix domain containing protein              |                        |               |  |



|                        |                                          |            |                                    |                                          |
|------------------------|------------------------------------------|------------|------------------------------------|------------------------------------------|
|                        |                                          | EHI_050420 | ERP2, YAL007C,FUN54                | Hypothetical protein                     |
|                        |                                          |            | ERP4, YOR016C                      |                                          |
|                        |                                          | EHI_088070 | SPB1, YCL054W, YCL431, YCL54W      | Ribosomal RNA methyl transferase         |
|                        |                                          |            | MRM2, YGL136C, G2830               |                                          |
|                        |                                          | EHI_188010 | FPR4, YLR449W                      | Hypothetical protein                     |
|                        | FPR3, NPI46,YML074C                      |            |                                    |                                          |
| Pre-40S particles      | Export and cytoplasmic maturation factor | EHI_148190 | GSP1, YLR293C, CNR1, CST17         | Ran family GTPase                        |
|                        |                                          |            | GSP2, YOR185C,CNR2                 |                                          |
| Other pre-40S particle |                                          | EHI_110320 | PTC3, YBL056W                      | Protein phosphatase                      |
|                        |                                          |            | PTC2, YER089C                      |                                          |
| Miscellaneous Proteins |                                          | EHI_012360 | RPS14A, CRY1, YCR031C, YCR31C      | Ribosomal protein S14                    |
|                        |                                          |            | RPS14B, CRY2, YJL191W, J0354       |                                          |
|                        |                                          | EHI_179000 | RPS9A, RPS13A, YS11A, YPL081W      | 40S ribosomal protein S9                 |
|                        |                                          |            | RPS9B, RPS13B, YBR189W, YBR1317    |                                          |
|                        |                                          | EHI_125780 | RPS9A, RPS13A, YS11A, YPL081W      |                                          |
|                        |                                          |            | RPS9B, RPS13B, YBR189W, YBR1318    |                                          |
|                        |                                          | EHI_126870 | RPS21A, RPS25, RPS25A, YKR057W     | 40S ribosomal protein S21                |
|                        |                                          |            | RPS21B, RPS25B, RPS26B, YJL136C    |                                          |
|                        |                                          | EHI_091070 | RVB1, TIH1, TIP49A, YDR190C        | ruvB-like DNA helicase                   |
|                        |                                          |            | RVB2, TIH2, TIP49B, YPL235W, P1060 |                                          |
|                        |                                          | EHI_040320 | MTR3, YGR158C                      | 3' exonuclease family protein            |
|                        |                                          |            | RRP46, YGR095C                     |                                          |
|                        |                                          |            | SKI6, ECM20, RRP41, YGR195W, G7587 |                                          |
|                        |                                          | EHI_040360 | RVB1, TIH1, TIP49A, YDR190C        | ruvB-like DNA helicase                   |
|                        |                                          |            | RVB2, TIH2, TIP49B, YPL235W, P1061 |                                          |
|                        |                                          | EHI_081410 | RPS0A, NAB1, YST1, NAB1A, YGR214W  | 40S ribosomal protein SA                 |
|                        |                                          |            | RPS0B, NAB1B, NAB4, YST2, YLR048W, |                                          |
|                        |                                          | EHI_068580 | LSM5, SAD1, At5g48870, K24G6.22    | U6 snRNA-associated Sm-like protein LSm2 |
|                        |                                          |            | LSM2, SMX5, SNP3, YBL026W, YBL0425 |                                          |

**Table 4: RNases in *S. cerevisiae* and homologs in human and *E.histolytica***

| Gene Name (Sc)     | Accession Number | Uniprot (Humans) | Gene Name (Humans) | Gene symbol (E. histolytica) | Transcription Status | Domains                                                                  |
|--------------------|------------------|------------------|--------------------|------------------------------|----------------------|--------------------------------------------------------------------------|
| RNT1, YMR239C      | KZV09092         | Q9NRR4           | DROSHA, RNASE3L    | --                           | --                   | --                                                                       |
| REX4, YOL080C      | KZV07802         | Q9GZR2           | REXO4, PMC2        | --                           | --                   | --                                                                       |
| DBR1, YKL149C,     | KZV09788         | Q9UK59           | DBR1               | EHI_062730                   | Low                  | RNA lariat debranching enzyme                                            |
| NGL2, YMR285C,     | KZV09140         | Q6L8Q7           | PDE12              | --                           | --                   | --                                                                       |
| REX2, YLR059C      | KZV09305         | Q9Y3B8           | REXO2, SFN         | --                           | --                   | --                                                                       |
| REX1, YGR276C      | KZV11510         | Q8IX06           | REXO1L1P, GOR      | --                           | --                   | --                                                                       |
| XRN1               | KZV11055         | Q8IZH2           | XRN1, SEP1         | EHI_133330                   | Medium               | 5'-3' exonuclease domain containing protein                              |
| RAT1, YOR048C      | CAA99240         | Q9H0D6           | XRN2               | EHI_128220<br>EHI_133330     | Medium<br>Medium     | 5'-3' exonuclease domain containing protein                              |
| RNase MRP subunits |                  |                  |                    |                              |                      |                                                                          |
| POP1, YNL221C      | KZV08402         | Q99575           | POP1 KIAA0061      | EHI_127090                   | Medium               | Hypothetical protein                                                     |
| POP3, YNL282W      | KZV08343         | --               |                    | --                           | --                   | --                                                                       |
| POP4, YBR257W      | KZV13345         | --               |                    | --                           | --                   | --                                                                       |
| POP5, YAL033W      | KZV13434         | Q969H6           | POP5, AD-008       | --                           | --                   | --                                                                       |
| POP6, YGR030C      | KZV11255         | --               |                    | --                           | --                   | --                                                                       |
| POP7, YBR167C      | KZV13248         | --               |                    | --                           | --                   | --                                                                       |
| POP8, YBL018C      | KZV13053         | --               |                    | --                           | --                   | --                                                                       |
| RPP1, YHR062C      | KZV10792         | P78346           | RPP30 RNASEP2      | EHI_086240<br>EHI_179350     | Medium<br>Medium     | Ribonuclease P protein subunit p30<br>Ribonuclease P protein subunit p30 |
| RMP1, YLR145W      | KZV09389         | --               |                    | --                           | --                   | --                                                                       |
| SNM1 YDR478W,      | KZV12719         | --               |                    | --                           | --                   | --                                                                       |

**Table 5: Up regulated (>1.5-fold change) genes during serum starvation as compared to normal**

|                                | Gene Family                               | Gene Description                                         | Log <sub>2</sub> Fold Change   | P-value |
|--------------------------------|-------------------------------------------|----------------------------------------------------------|--------------------------------|---------|
| 90S particles                  | U3 snoRNA-associated proteins             | EHI_138370 Hypothetical protein                          | 0.73                           | 0.073   |
|                                | Helicase                                  | EHI_033720 DEAD>DEAH box helicase                        | 0.60                           | 0.338   |
|                                |                                           | EHI_122790 Helicase                                      | 0.77                           | 0.394   |
| 90S particles>pre-60S particle | Helicase                                  | EHI_169630 DEAD>DEAH box helicase                        | 0.86                           | 0.111   |
| Pre-40S particles              | Kinase                                    | EHI_050990 RIO1 family protein                           | 0.64                           | 0.406   |
|                                |                                           | EHI_156390 Casein kinase                                 | 3.56                           | 0.078   |
|                                | Export and cytoplasmic maturation factor  | EHI_175470 Hypothetical protein                          | 1.00                           | 0.008   |
| Other pre-40S particle         |                                           | EHI_056420 Protein phosphatase                           | 0.92                           | 0.012   |
|                                |                                           | EHI_174280 Phospholipid transporting P-type ATPase       | 0.67                           | 0.680   |
| Pre-60S particles              | Helicase                                  | EHI_125170 DEAD>DEAH box helicase                        | 0.96                           | 0.121   |
|                                | Rnase MRP                                 | EHI_179350 Ribonuclease P protein subunit p31            | 0.92                           | 0.382   |
|                                |                                           | EHI_086240 Ribonuclease P protein subunit p30            | 0.73                           | 0.304   |
|                                |                                           | GTPase                                                   | EHI_166810 Elongation factor 2 | 1.13    |
|                                | Export and cytoplasmic maturation factors | EHI_113410 Heat shock protein 70                         | 1.49                           | 0.138   |
|                                |                                           | EHI_175440 Non transporter ABC protein                   | 0.62                           | 0.331   |
|                                |                                           | EHI_083120 Nonsense mediated mRNA decay protein 3        | 0.83                           | 0.329   |
|                                |                                           | EHI_192440 Heat shock protein 70, hsp70A2                | 0.94                           | 0.063   |
|                                |                                           | EHI_199590 Heat shock protein 70                         | 1.25                           | 0.098   |
| Other pre-60S particles        |                                           | EHI_050420 Hypothetical protein                          | 1.43                           | 0.082   |
|                                |                                           | EHI_038310 60S ribosome subunit biogenesis protein NIP11 | 0.70                           | 0.185   |
|                                |                                           | EHI_059540 Brix domain containing protein                | 0.95                           | 0.709   |
| Miscellaneous Proteins         |                                           | EHI_187180 Ubiquitin-protein ligase                      | 0.62                           | 0.451   |

**The genes with a P-value < 0.5 are highlighted in yellow.**

**Table 6: Down regulated (>1.5-fold change) genes during serum starvation as compared to normal**

|                         | Gene family                               | Gene Description                                                  | Log <sub>2</sub> Fold Change | P-value |
|-------------------------|-------------------------------------------|-------------------------------------------------------------------|------------------------------|---------|
| SnoRNPs                 | Box H>ACA snoRNPs                         | EHI_001850 H>ACA ribonucleoprotein complex subunit 2-like protein | -0.60                        | 0.022   |
|                         |                                           | EHI_102280 H>ACA ribonucleoprotein complex subunit 2-like protein | -0.60                        | 0.022   |
| 90S particles           | U3 snoRNA associated proteins             | EHI_179100 Hypothetical protein                                   | -1.13                        | 0.195   |
|                         |                                           | EHI_012960 Hypothetical protein                                   | -0.63                        | 0.574   |
|                         |                                           | EHI_198890 Hypothetical protein                                   | -0.61                        | 0.469   |
| Other 90S particles     |                                           | EHI_033750 Hypothetical protein                                   | -0.61                        | 0.168   |
|                         |                                           | EHI_044610 Ribosome biogenesis protein NEP1                       | -1.56                        | 0.025   |
| Pre-40S particles       | Export and cytoplasmic maturation factor  | EHI_164410 Hypothetical protein                                   | -0.60                        | 0.524   |
|                         |                                           | EHI_001120 Hypothetical protein                                   | -0.80                        | 0.066   |
|                         |                                           | EHI_100490 Hypothetical protein                                   | -0.63                        | 0.050   |
| Pre-60S particles       | Helicase                                  | EHI_134610 DEAD>DEAH box helicase                                 | -0.79                        | 0.209   |
|                         | GTPase                                    | EHI_164370 GTPase                                                 | -1.03                        | 0.111   |
|                         | Export and cytoplasmic maturation factors | EHI_052860 Heat shock protein 70                                  | -0.62                        | 0.136   |
|                         |                                           | EHI_179200 Hypothetical protein                                   | -0.65                        | 0.475   |
|                         |                                           | EHI_104460 Nonsense mediated mRNA decay protein 4                 | -1.23                        | 0.476   |
| Other pre-60S particles |                                           | EHI_105790 Nucleolar complex protein 2 homolog                    | -0.65                        | 0.572   |
| Miscellaneous Proteins  |                                           | EHI_021400 Exosome component 10                                   | -0.77                        | 0.444   |
|                         |                                           | EHI_104570 Ubiquitin ligase                                       | -1.75                        | 0.171   |

**Table 7: Up-regulated genes (>1.5-fold change) in Rrp6KO as compared to TOC**

|                | Gene family     | Gene Description                                      | Log <sub>2</sub> Fold Change | P-value |
|----------------|-----------------|-------------------------------------------------------|------------------------------|---------|
| <b>SnoRNPs</b> | Box C>D snoRNPs | EHI_183900 snoRNA binding protein putative            | 0.95                         | 0.003   |
|                |                 | EHI_104600 13kDa ribonucleoprotein-associated protein | 0.81                         | 0.008   |

|                            |                                                  |                                                            |      |       |
|----------------------------|--------------------------------------------------|------------------------------------------------------------|------|-------|
|                            | Box H>ACA<br>snoRNPs                             | EHI_115300 Centromere>microtubule binding protein          | 0.81 | 0.002 |
| <b>90S particles</b>       | U3 small nucleolar<br>RNA-associated<br>proteins | EHI_142200 U3 snRNP subunit                                | 1.21 | 0.051 |
|                            |                                                  | EHI_048860 U3 snRNP MPP10                                  | 1.28 | 0.065 |
|                            |                                                  | EHI_198890 Hypothetical protein                            | 0.81 | 0.133 |
|                            |                                                  | EHI_067830 WD domain containing protein                    | 0.65 | 0.046 |
|                            |                                                  | EHI_140750 WD domain containing protein                    | 0.70 | 0.014 |
|                            |                                                  | EHI_138370 Hypothetical protein                            | 0.90 | 0.043 |
|                            |                                                  | EHI_148770 Hypothetical protein                            | 1.04 | 0.043 |
|                            | Helicases                                        | EHI_119620 DEAD>DEAH box helicase                          | 1.10 | 0.023 |
|                            |                                                  | EHI_169630 DEAD>DEAH box helicase                          | 3.50 | 0.003 |
|                            |                                                  | EHI_175030 DEAD>DEAH box helicase                          | 0.61 | 0.010 |
|                            |                                                  | EHI_096390 DEAD>DEAH box helicase                          | 1.01 | 0.005 |
|                            |                                                  | EHI_013960 DEAD>DEAH box helicase                          | 1.08 | 0.019 |
|                            |                                                  | EHI_122790 Helicase                                        | 0.62 | 0.279 |
|                            |                                                  | EHI_014080 DEAD>DEAH box helicase                          | 0.86 | 0.001 |
|                            |                                                  | EHI_033720 DEAD>DEAH box helicase                          | 1.80 | 0.000 |
|                            | GTPase                                           | EHI_196410 Ribosome biogenesis protein BMS1                | 0.69 | 0.021 |
| <b>Other 90S particles</b> |                                                  | EHI_160440 rRNA biogenesis protein RRP5                    | 1.90 | 0.048 |
|                            |                                                  | EHI_142050 Hypothetical protein                            | 1.01 | 0.022 |
|                            |                                                  | EHI_124060 rRNA biogenesis protein RRP5                    | 1.77 | 0.147 |
|                            |                                                  | EHI_092660 Hypothetical protein                            | 1.45 | 0.025 |
|                            |                                                  | EHI_014120 RNA recognition motif domain containing protein | 0.79 | 0.053 |
| <b>Pre-40S particles</b>   | Kinase                                           | EHI_151950 Casein kinase                                   | 0.70 | 0.021 |
|                            |                                                  | EHI_156390 Casein kinase                                   | 4.97 | 0.004 |
|                            | Export and<br>cytoplasmic<br>maturation factor   | EHI_175470 Hypothetical protein                            | 0.78 | 0.177 |
|                            |                                                  | EHI_171760 Hypothetical protein                            | 0.65 | 0.020 |
|                            |                                                  | EHI_013870 Dimethyladenosine transferase                   | 2.51 | 0.001 |
|                            |                                                  | EHI_008390 Hypothetical protein                            | 0.79 | 0.002 |

|                         |                                               |                                                       |       |       |
|-------------------------|-----------------------------------------------|-------------------------------------------------------|-------|-------|
|                         |                                               | EHI_004960 Bystin                                     | 1.12  | 0.008 |
|                         | Other pre-40S particle                        | EHI_096620 Phospholipid transporting P-type ATPase    | 1.01  | 0.006 |
|                         |                                               | EHI_024120 Phospholipid transporting P-type ATPase    | 1.16  | 0.000 |
|                         |                                               | EHI_056420 Protein phosphatase                        | 1.21  | 0.007 |
| Pre-60S particles       | Helicases                                     | EHI_069410 DEAD>DEAH box helicase                     | 0.82  | 0.013 |
|                         |                                               | EHI_078560 DEAD>DEAH box helicase                     | 1.03  | 0.024 |
|                         |                                               | EHI_125170 DEAD>DEAH box helicase                     | 1.18  | 0.010 |
|                         |                                               | EHI_165110 DEAD>DEAH box helicase                     | 1.07  | 0.022 |
|                         | GTPase                                        | EHI_164370 GTPase                                     | 1.15  | 0.024 |
|                         |                                               | EHI_174940 Nucleolar GTP-binding protein              | 1.41  | 0.007 |
|                         |                                               | EHI_118800 Hypothetical protein                       | 1.03  | 0.027 |
|                         |                                               | EHI_155660 Elongation factor 2                        | 1.21  | 0.005 |
|                         |                                               | EHI_164510 Elongation factor 2                        | 0.76  | 0.001 |
|                         |                                               | EHI_166810 Elongation factor 2                        | 1.49  | 0.024 |
|                         |                                               |                                                       |       |       |
|                         | RNase MRP                                     | EHI_127090 Hypothetical protein                       | 1.48  | 0.027 |
|                         |                                               | EHI_086240 Ribonuclease P protein subunit p30         | 1.28  | 0.007 |
|                         | Export and cytoplasmic maturation factors     | EHI_175440 Non transporter ABC protein                | 0.97  | 0.011 |
|                         |                                               | EHI_188830 DnaJ domain containing protein             | 1.14  | 0.027 |
|                         |                                               | EHI_006170 Eukaryotic translation initiation factor 6 | 1.54  | 0.003 |
|                         |                                               | EHI_113410 Heat shock protein 70                      | 0.87  | 0.108 |
|                         |                                               | EHI_199590 Heat shock protein 70                      | 1.75  | 0.003 |
|                         |                                               | EHI_013760 Heat shock protein 70, mitochondrial       | 0.64  | 0.361 |
|                         |                                               | EHI_007150 Heat shock protein 70, mitochondrial       | 1.11  | 0.026 |
|                         |                                               | EHI_154230 Zinc finger protein 622                    | 0.90  | 0.015 |
|                         |                                               | EHI_104460 Nonsense mediated mRNA decay protein 3     | 0.97  | 0.437 |
|                         |                                               | EHI_081250 Importin beta-3 family protein             | 0.95  | 0.056 |
|                         |                                               |                                                       |       |       |
| Other pre-60S particles | EHI_009860 Hypothetical protein               | 1.59                                                  | 0.016 |       |
|                         | EHI_104410 Pumilio family RNA binding protein | 1.64                                                  | 0.042 |       |
|                         | EHI_045120 Cell division cycle protein 48     | 1.09                                                  | 0.002 |       |

|                               |                                                            |      |       |
|-------------------------------|------------------------------------------------------------|------|-------|
|                               | EHI_176970 Cdc48 like protein                              | 1.01 | 0.002 |
|                               | EHI_006010 Hypothetical protein                            | 0.65 | 0.011 |
|                               | EHI_009540 Hypothetical protein                            | 1.37 | 0.010 |
|                               | EHI_088070 Ribosomal RNA methyl transferase                | 0.87 | 0.085 |
|                               | EHI_012190 Brix domain containing protein                  | 1.19 | 0.014 |
|                               | EHI_118030 WD repeat protein                               | 0.93 | 0.002 |
|                               | EHI_014120 RNA recognition motif domain containing protein | 0.79 | 0.053 |
|                               | EHI_198880 Proliferating cell nucleolar antigen p120       | 1.12 | 0.002 |
|                               | EHI_153780 Hypothetical protein                            | 1.27 | 0.056 |
| <b>Miscellaneous Proteins</b> | EHI_187180 Ubiquitin-protein ligase                        | 1.54 | 0.003 |
|                               | EHI_163510 Exosome complex exonuclease Rrp4                | 1.36 | 0.006 |
|                               | EHI_000580 Exosome complex exonuclease                     | 1.03 | 0.055 |
|                               | EHI_160720 Exosome complex exonuclease                     | 0.78 | 0.043 |
|                               | EHI_111220 tRNA splicing endonuclease                      | 1.37 | 0.044 |
|                               | EHI_053830 La ribonucleoprotein                            | 1.53 | 0.032 |
|                               | EHI_199620 Hypothetical protein                            | 2.21 | 0.002 |
|                               | EHI_097980 Hypothetical protein                            | 0.86 | 0.010 |
|                               | EHI_040360 ruvB-like DNA helicase                          | 0.72 | 0.008 |
|                               | EHI_104570 Ubiquitin ligase                                | 1.65 | 0.046 |
|                               | EHI_011530 Ubiquitin-protein ligase                        | 0.62 | 0.164 |

**Table 8: Down regulated genes (>1.5-fold change) in Rrp6KO as compared to TOC**

|                         | Gene Name (Sc)                             | Gene Description                                              | Log <sub>2</sub> Fold Change | P-value |
|-------------------------|--------------------------------------------|---------------------------------------------------------------|------------------------------|---------|
| SnoRNPs                 | Box H>ACA snoRNPs                          | EHI_053440 13kDa ribonucleoprotein-associated protein         | -0.85                        | 0.070   |
| 90S particles           | U3 small nucleolar RNA-associated proteins | EHI_035170 U3 snRNP subunit                                   | -0.62                        | 0.050   |
|                         |                                            | EHI_146820 U3 snRNP subunit                                   | -0.62                        | 0.050   |
|                         |                                            | EHI_184000 U3 snRNP subunit                                   | -0.62                        | 0.050   |
|                         |                                            | EHI_012960 Hypothetical protein                               | -0.68                        | 0.110   |
|                         |                                            | EHI_199160 Hypothetical protein                               | -1.47                        | 0.037   |
|                         | Helicases                                  | EHI_184530 Helicase                                           | -2.62                        | 0.098   |
|                         |                                            | EHI_077640 Helicase, ATP-dependent helicase                   | -0.67                        | 0.155   |
|                         |                                            | EHI_093900 DEAD>DEAH box helicase                             | -0.95                        | 0.019   |
|                         | Kinase                                     | EHI_006800 Casein kinase                                      | -0.63                        | 0.060   |
|                         |                                            | EHI_038670 Protein kinase domain containing protein           | -1.85                        | 0.170   |
|                         |                                            | EHI_152350 Casein kinase II regulatory subunit family protein | -2.25                        | 0.016   |
| Other 90S particles     |                                            | EHI_044610 Ribosome biogenesis protein NEP1                   | -2.19                        | 0.042   |
|                         |                                            | EHI_085680 WD repeat protein                                  | -1.06                        | 0.205   |
|                         |                                            | EHI_083380 Hypothetical protein                               | -1.28                        | 0.145   |
| Pre-40S particles       | Kinase                                     | EHI_049390 Casein kinase                                      | -0.84                        | 0.034   |
|                         |                                            | EHI_170330 RIO1 family protein                                | -0.62                        | 0.056   |
|                         | Export and cytoplasmic maturation factor   | EHI_001120 Hypothetical protein                               | -1.70                        | 0.016   |
|                         |                                            | EHI_169830 Hypothetical protein                               | -0.91                        | 0.116   |
|                         |                                            | EHI_100490 Hypothetical protein                               | -0.87                        | 0.030   |
|                         |                                            | EHI_062760 Programmed cell death protein 2                    | -0.87                        | 0.012   |
| Pre-60S particles       | Helicases                                  | EHI_052790 DEAD>DEAH box helicase                             | -0.87                        | 0.159   |
|                         | Export and cytoplasmic maturation factors  | EHI_192440 Heat shock protein 70, hsp70A2                     | -0.74                        | 0.592   |
|                         |                                            | EHI_102940 60S acidic ribosomal protein PO                    | -1.20                        | 0.003   |
| Other pre-60S particles |                                            | EHI_050420 Hypothetical protein                               | -1.31                        | 0.014   |



|                                          |                                                         |       |       |
|------------------------------------------|---------------------------------------------------------|-------|-------|
|                                          | EHI_188010 Hypothetical protein                         | -2.39 | 0.004 |
|                                          | EHI_038310 60S ribosome subunit biogenesis protein NIP7 | -1.23 | 0.054 |
| <b>Other ribosome biogenesis factors</b> | EHI_118860 Putative methyltransferase NSUN5             | -0.62 | 0.014 |
|                                          | EHI_152400 Hypothetical protein                         | -0.69 | 0.083 |
| <b>Miscellaneous Proteins</b>            | EHI_020280 40S ribosomal protein S2                     | -0.81 | 0.042 |
|                                          | EHI_068580 U6 snRNA-associated Sm-like protein LSm2     | -0.69 | 0.232 |
|                                          | EHI_151310 U6 snRNA-associated Sm-like protein LSm3     | -1.02 | 0.077 |
|                                          | EHI_049370 LSM domain containing protein                | -1.18 | 0.231 |
|                                          | EHI_025840 LSM domain containing protein                | -0.63 | 0.027 |

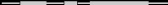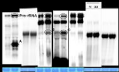

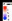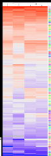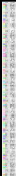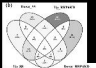

Normal growth  
conditions

Starvation/starved  
conditions

Normal Phe<sup>o</sup>MPs  
transcription and processing

Down regulation of  
Nup1, Nup193 and  
Taf1 required for 35S  
rRNA maturation

Alternative 1-pyrimidine  
regulation of both genes also  
required for processing of  
mRNAs

Down regulation of  
Nup193 also impairs  
the proteins

Up regulation of  
Nup193 required for  
ribosomal pathway

Processing defective,  
accumulation of  
intermediates

Up regulation of 1  
codon Nup193, a better  
regulator for post-ribosomal  
processing

Down regulation of  
Nup193 component  
for 19S

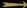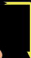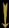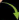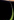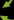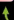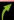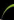

Source: http://biorxiv.org/content/10.1101/2021.08.01.454488v1.full.pdf
